# Supplementary material for: Impact of COVID-19 on the digital divide: a rapid review
Source: PubMed Central journal article supplement — BMJ Open. 2021 Oct 12;11(10):e053440. doi: 10.1136/bmjopen-2021-053440 (PMC8520586; doi:10.1136/bmjopen-2021-053440), 2021-10-12
Supplement: bmjopen-2021-053440.draft_revisions.pdf [file bmjopen-2021-053440.draft_revisions.pdf]

# BMJ Open

BMJ Open is committed to open peer review. As part of this commitment we make the peer review history of every article we publish publicly available.

When an article is published we post the peer reviewers' comments and the authors' responses online. We also post the versions of the paper that were used during peer review. These are the versions that the peer review comments apply to.

The versions of the paper that follow are the versions that were submitted during the peer review process. They are not the versions of record or the final published versions. They should not be cited or distributed as the published version of this manuscript.

BMJ Open is an open access journal and the full, final, typeset and author-corrected version of record of the manuscript is available on our site with no access controls, subscription charges or pay-per-view fees (<http://bmjopen.bmj.com>).

If you have any questions on BMJ Open's open peer review process please email [info.bmjopen@bmj.com](mailto:info.bmjopen@bmj.com)

# BMJ Open

## The impact of COVID-19 on the the digital divide: A rapid review

|                               |                                                                                                                                                                                                                   |
|-------------------------------|-------------------------------------------------------------------------------------------------------------------------------------------------------------------------------------------------------------------|
| Journal:                      | <i>BMJ Open</i>                                                                                                                                                                                                   |
| Manuscript ID                 | bmjopen-2021-053440                                                                                                                                                                                               |
| Article Type:                 | Original research                                                                                                                                                                                                 |
| Date Submitted by the Author: | 13-May-2021                                                                                                                                                                                                       |
| Complete List of Authors:     | Litchfield, Ian; University of Birmingham<br>Shukla, David; University of Birmingham<br>Greenfield, Sheila; University of Birmingham College of Medical and Dental Sciences, Institute of Applied Health Research |
| Keywords:                     | COVID-19, Organisation of health services < HEALTH SERVICES ADMINISTRATION & MANAGEMENT, Quality in health care < HEALTH SERVICES ADMINISTRATION & MANAGEMENT                                                     |
|                               |                                                                                                                                                                                                                   |

SCHOLARONE™  
Manuscripts

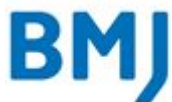

I, the Submitting Author has the right to grant and does grant on behalf of all authors of the Work (as defined in the below author licence), an exclusive licence and/or a non-exclusive licence for contributions from authors who are: i) UK Crown employees; ii) where BMJ has agreed a CC-BY licence shall apply, and/or iii) in accordance with the terms applicable for US Federal Government officers or employees acting as part of their official duties; on a worldwide, perpetual, irrevocable, royalty-free basis to BMJ Publishing Group Ltd ("BMJ") its licensees and where the relevant Journal is co-owned by BMJ to the co-owners of the Journal, to publish the Work in this journal and any other BMJ products and to exploit all rights, as set out in our [licence](#).

The Submitting Author accepts and understands that any supply made under these terms is made by BMJ to the Submitting Author unless you are acting as an employee on behalf of your employer or a postgraduate student of an affiliated institution which is paying any applicable article publishing charge ("APC") for Open Access articles. Where the Submitting Author wishes to make the Work available on an Open Access basis (and intends to pay the relevant APC), the terms of reuse of such Open Access shall be governed by a Creative Commons licence – details of these licences and which [Creative Commons](#) licence will apply to this Work are set out in our licence referred to above.

Other than as permitted in any relevant BMJ Author's Self Archiving Policies, I confirm this Work has not been accepted for publication elsewhere, is not being considered for publication elsewhere and does not duplicate material already published. I confirm all authors consent to publication of this Work and authorise the granting of this licence.

1  
2  
3 **The impact of COVID-19 on the digital divide: A rapid review**  
4  
5

6 **3500 words**  
7

8  
9 Ian Litchfield <sup>1§</sup>  
10

11  
12 David Shukla<sup>1</sup>  
13

14  
15 Sheila Greenfield<sup>1</sup>  
16  
17

18  
19  
20  
21  
22 1§ Corresponding author  
23

24 University of Birmingham College of Medical and Dental Sciences, Room 104, IOEM, Institute  
25 of Applied Health Research, Birmingham, UK B15 2TT  
26

27 Email [i.litchfield@bham.ac.uk](mailto:i.litchfield@bham.ac.uk)  
28  
29

30  
31 1. Institute of Applied Health Research, College of Medical and Dental Sciences, University of  
32 Birmingham, Birmingham, UK B15 2TT  
33  
34

35  
36  
37  
38  
39  
40 **Keywords**  
41

42 Digital divide; Health inequalities; COVID-19  
43  
44  
45  
46  
47  
48  
49  
50  
51  
52  
53  
54  
55  
56  
57  
58  
59  
60

## Abstract

### Objective

The increased reliance on digital technologies to deliver healthcare as a result of the COVID pandemic has meant pre-existing disparities in digital access and utilisation of healthcare might be exacerbated in disadvantaged patient populations. The aim of this rapid review conducted in January 2021 was to identify how this 'digital divide' was manifest during the first wave of the pandemic and highlight any areas which might be usefully addressed for the remainder of the pandemic and beyond.

### Design

Rapid review and narrative synthesis

### Data sources

The major medical databases including PubMed and Embase were searched alongside a hand-search of bibliographies.

### Eligibility criteria

Original research papers available in English which described studies conducted since the beginning of the COVID-19 pandemic spring 2020.

### Results

The search was described using PRISMA and identified nine studies. The results are presented within a novel framework consisting of the three key domains of the digital divide; 1) Digital Access, where a study described continuing issues with internet connectivity amongst vulnerable patients in the UK where described. 2) Digital Literacy, where seven studies described how ethnic minorities and the elderly were less likely to use digital technologies in accessing care. 3) Digital Assimilation,

1  
2  
3 where one study described how video technologies can reduce feelings of isolation and another  
4  
5 how elderly black males were the most likely group to share information about COVID-19 on social  
6  
7 media platforms.  
8  
9

## 10 **Conclusions**

11  
12  
13 Familiar difficulties in utilisation of digital healthcare amongst the elderly and ethnic minorities  
14  
15 continue to be observed despite the unprecedented risk associated with direct contact with care  
16  
17 providers. This is a further reminder that the digital divide is a persistent challenge that needs to be  
18  
19 urgently addressed when considering the likelihood that in many instances these digital  
20  
21 technologies are likely to remain at the centre of healthcare delivery.  
22  
23  
24  
25  
26  
27  
28

## 29 **Strengths and limitations of this study**

30  
31  
32 The longstanding societal variations in the access and utilisation of digital technologies (A.K.A. the  
33  
34 digital divide) in the pursuit of healthcare is widely recognised.  
35  
36

37 The enforced reliance on digital healthcare as a result of the COVID pandemic is likely to  
38  
39 exacerbate the digital divide and further impact disadvantaged groups.  
40  
41

42 Our rapid review provided evidence of how pre-existing societal disparities in the access and  
43  
44 utilisation of health-related digital technologies were accentuated by COVID-19.  
45  
46

47 The findings were presented within a novel framework that provides a comprehensive context for  
48  
49 this and future explorations of the digital divide.  
50  
51  
52  
53  
54  
55  
56  
57  
58  
59  
60

## Introduction

A growing range of digital tools have been developed to help patients track their condition, connect with peer and clinical support, enable self-management, and aid more appropriate utilisation of health services (1, 2). When coordinated with the appropriate digital infrastructure they appear well placed to meet the need for more effective personalised healthcare, (3) that is capable of bridging the gap between increasing demand and restricted resource (4). The World Health Organisation's (WHO) recently launched global strategy for digital health confirmed the expected role of digital technologies in creating a more equitable future for healthcare by offering "effective clinical and public health solutions to accelerate the achievement of the health and well-being... leaving none behind, [whether] children or adults, rural or urban." (5).

Implicit within the digital transformation of healthcare and its role in reducing inequalities is that the relevant technologies are available across all levels of society (6, 7). However persistent discrepancies exist between communities in how they access and utilise digital technologies, differences compounded by the growing sophistication in the functionality of devices and connectivity (8). The result is that comparative advantages continue to be afforded to those groups that can maximise the capabilities of digital technologies (9, 10). These societal differences in access and adoption are commonly referred to as the "digital divide" (10), a catch-all phrase which implies a simple dichotomy but in reality describes a complex range of users whose level of adoption changes over time influenced by infrastructure, socio-economic environment and individual characteristics such as educational background and physical disability (11-15).

Despite acknowledged inequities in digital access and utilisation measures introduced to reduce infection rates following the onset of the COVID- 19 pandemic in spring 2020. The understanding

1  
2  
3 that it was spread by person-to-person contact led to an acceleration of the reliance on digital  
4 health technologies both in Europe and the United States of America (6, 16-18). Because the  
5 spread of COVID was so rapid many of these digital interventions were introduced without the  
6 recommended periods of consultation and evaluation (19, 20). This led to concerns that the digital  
7 divide means these new models of healthcare delivery will disproportionately affect the health of  
8 disadvantaged communities (21-24) such as ethnic minorities (25), rural populations (26), the  
9 elderly (27) and residents of care homes (28). These concerns were heightened when it became  
10 apparent that the same groups on the “wrong” side of the digital divide were the most likely to  
11 experience severe symptoms and higher levels of mortality as a result of contracting the virus (21-  
12 24)

13  
14  
15  
16  
17  
18  
19  
20  
21  
22  
23  
24  
25  
26  
27  
28  
29  
30 Many of these novel digitally-reliant processes that in March 2020 were considered a short-term fix  
31 are now becoming embedded in existing systems of care in the United Kingdom and elsewhere (17,  
32 29). Therefore it is important to understand the implications of these new systems for patients and  
33 the quality and safety of the care they receive. This rapid review aims to explore how the digital  
34 divide manifested during the first wave of COVID-19 generating knowledge that can improve digital  
35 inclusion for the remainder of the pandemic and beyond.

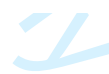

## 46 47 **Methods**

### 48 49 *Study design*

50  
51  
52  
53 Rapid reviews have previously been recommended for their ability to provide timely and credible  
54 evidence (30) and this review will draw on the major medical databases using the principles of the  
55 Preferred Reporting Items for Systematic Reviews and Meta-Analyses (PRISMA )to describe the  
56  
57  
58  
59  
60



1  
2  
3 search (31). The results are presented within a novel framework that enables a more systematic  
4  
5 description of the various aspects of the digital divide explored by each study (see Box 1).  
6  
7  
8  
9

### 10 11 *Search strategy*

12  
13  
14 We searched PubMed, Embase, and Google Scholar, alongside hand-searches of bibliographies to  
15  
16 identify relevant manuscripts. In doing so we used a combination of the search terms 'COVID 19' or  
17  
18 'pandemic' or 'COVID' and 'digital health' or 'telemedicine' or 'remote access' or 'digital divide' to  
19  
20 identify studies which had explored the access or utilisation of information or communication  
21  
22 technologies in relation to health and care since the onset of the COVID-19 pandemic.  
23  
24  
25  
26  
27  
28

### 29 30 *Inclusion criteria*

31  
32 To be included in our review, the manuscript must consist of original research specific to individuals  
33  
34 using digital technologies in relation to their health or well-being since the beginning of the  
35  
36 pandemic recognised by the WHO as March 2020 until January 2021 (32). This includes the  
37  
38 diagnosis, monitoring, or treatment of COVID-19 and any other condition or disease. The focus of  
39  
40 our work was the provision of care within the developed world to ensure relevance for  
41  
42 policymakers, commissioners and providers in these areas and so we limited the papers included to  
43  
44 those that were available in English.  
45  
46  
47  
48  
49  
50

### 51 52 *Study selection*

53  
54 The process followed the four-stages of PRISMA (31); identification, screening, eligibility and final  
55  
56 inclusion and the search data presented in the PRISMA diagram (see Figure 1). This involved two  
57  
58  
59  
60

1  
2  
3 reviewers (IL and SG) screening titles, abstracts and where appropriate full texts against the  
4  
5 inclusion criteria and the final selection of papers agreed by both.  
6  
7  
8  
9

## 10 11 **Figure 1 PRISMA diagram**

12  
13  
14  
15

### 16 *Analysis procedures*

17  
18 We developed a framework that built on the work of Ai-chi Loh et al (33) to reflect a more nuanced  
19  
20 representation of the digital divide by describing it within three key domains; Digital Access relating  
21  
22 to the ability to access devices and internet; Digital Literacy describing the skill set of individuals,  
23  
24 and Digital Assimilation addressing the degree to which digital technologies are incorporated into  
25  
26 everyday life. Each domain consists of a series of related constructs and these are further defined  
27  
28 and presented with examples of each in Box 1. A descriptive summary of the characteristics of  
29  
30 each included study was produced (see Table 1) and the findings from the identified papers are  
31  
32 analysed within each of the key domains of the framework.  
33  
34  
35  
36  
37  
38  
39

### 40 **Patient and public involvement**

41  
42 No patients or members of the public were involved in the conceptualisation, design or  
43  
44 undertaking of this rapid review.  
45  
46  
47  
48  
49  
50  
51  
52  
53  
54  
55  
56  
57  
58  
59  
60

**Box 1 Framework for interpreting the digital divide in healthcare (after Ai-chi Loh et al (33))**

| <b>Domain</b>               | <b>Definition</b>                                                                                                                       | <b>Construct</b>                                             | <b>Definition</b>                                                                                       | <b>Example</b>                                                                                                           |
|-----------------------------|-----------------------------------------------------------------------------------------------------------------------------------------|--------------------------------------------------------------|---------------------------------------------------------------------------------------------------------|--------------------------------------------------------------------------------------------------------------------------|
| <b>Digital Access</b>       | The ability to access the necessary hardware, software, and internet services associated with utilisation of digital technologies (34). | <i>The types of device available</i>                         | The nature and functionality of the digital device (10).                                                | The model of smartphone or desktop computer and any peripheral or supporting technology such as hard drives or printers. |
|                             |                                                                                                                                         | <i>The ease with which devices can be accessed</i>           | How readily individuals can access digital devices (8, 10).                                             | Relying on the local library for access to a computer.                                                                   |
|                             |                                                                                                                                         | <i>The autonomy and reliability of internet connectivity</i> | The degree of independence with which the internet can be reliably accessed (35, 36).                   | Consistent access to the internet via a user's home internet network.                                                    |
| <b>Digital Literacy</b>     | The degree of sophistication with which individuals are able to use digital technologies (37).                                          | <i>Digital skill set</i>                                     | The confidence and ability of an individual to utilise a variety of digital technologies (38).          | The ability to use and manage email.                                                                                     |
|                             |                                                                                                                                         | <i>Types of digital usage</i>                                | The ways in which digital technologies are utilised (39).                                               | Using search engines to access information on current affairs                                                            |
| <b>Digital Assimilation</b> | The degree to which digital technologies are incorporated and utilised in everyday life (34, 40).                                       | <i>Engagement with digital technologies</i>                  | The degree to which individuals use digital technologies to enhance social connections and values (41). | Establishing a community group on a social media platform to support elderly neighbours.                                 |
|                             |                                                                                                                                         | <i>Social support</i>                                        | Social connections that facilitate an individual's engagement with digital technologies (38).           | The availability of technical support in the use of digital technologies from a son or daughter.                         |
|                             |                                                                                                                                         | <i>Harnessing digital outcomes</i>                           | The ability to contextualise the use of digital technologies to achieve quantifiable outputs (42, 43).  | Using software apps to reach and maintain fitness goals.                                                                 |

## Results

A total of 28 candidate articles were identified from a search of the named databases and hand-searches from the bibliographies of these references. Ultimately nine papers were selected for the analysis, the remaining papers were excluded as they were either opinion pieces that did not contain original research or despite being published after March 2020 referenced research conducted prior to the onset of the epidemic.

One study looked at Digital Access; set in UK primary care it explored internet connectivity amongst vulnerable patients (44). It was also one of the seven studies that looked at Digital Literacy (44) alongside five studies set in the United States that explored the use of digital technologies in accessing care amongst different ethnic groups (45-49) and one study conducted in Italy that looked at the age and gender of patients using telemedicine (50). Two studies were concerned with Digital Assimilation, one set in Italy described the social support gained from using video messaging platforms (51) and a second again set in the United States explored the characteristics of individuals posting COVID-related content on social media (52). The key characteristics of these papers are summarised in Table 1.

**Table 1 Summary of study characteristics**

| <b>Authors</b>                             | <b>Study design</b> | <b>Country</b> | <b>Study Population</b>            | <b>Research question</b>                                                                                        | <b>Analytical framework</b>                    | <b>Findings</b>                                                                                                                                                                                                                                                |
|--------------------------------------------|---------------------|----------------|------------------------------------|-----------------------------------------------------------------------------------------------------------------|------------------------------------------------|----------------------------------------------------------------------------------------------------------------------------------------------------------------------------------------------------------------------------------------------------------------|
| Campos-Castillo & Anthony (2020) (49)      | Cohort Study        | USA            | 10 624 USA-wide survey respondents | What are the characteristics of patients that used ICTs to connect with care providers in relation to COVID-19. | Logistic regression                            | Total of 17% of respondents self-reported using telehealth because of the pandemic. Black respondents were more likely than Whites to report using telehealth because of the pandemic (OR, 1.42; 95% CI, 1.07–1.88).                                           |
| Campos-Castillo C & Laestadius (2020) (52) | Cohort study        | USA            | 10,541 USA-wide survey respondents | What are the characteristics of patients posting COVID-19 related messages on social media                      | Logistic regression                            | Respondents who identified as black (OR 1.29, 95% CI 1.02-1.64; <i>P</i> =.03), or Latino (OR 1.66, 95% CI 1.36-2.04; <i>PP</i> =.03) had higher odds than respondents who identified as white of reporting that they posted COVID-19 content on social media. |
| Chunara R, et al (2020) (45)               | Cohort study        | USA            | 140,184 patients                   | What are the characteristics of patients that use telemedicine                                                  | Descriptive statistics and logistic regression | Black patients nearly half as likely as white patients to access care through telemedicine (OR 0.6 times (95% CI: 0.58–0.63)                                                                                                                                   |
| Eberly, et al. (2020) (48)                 | Cohort study        | USA            | 2,940 cardiovascular outpatients   | What are the characteristics of patients that complete a telemedicine consultation                              | Logistic regression                            | Being female and being non-English speaking were independently associated with less telemedicine use.                                                                                                                                                          |
| Gabbiadini et al 2020 (51)                 | Cross-sectional     | Italy          | 465 respondents                    | Whether the use ICT promoted perceptions of social support (mitigating the psychological effects of lockdown)   | Separate multiple and simple regression models | The amount of technology use was a significant predictor of perceived social support. (OR 2.40, <i>p</i> < 0.02, 99% CI –0.01, 0.31).                                                                                                                          |

|                           |                 |       |                                                                                                    |                                                                                                                                                      |                                                                                                                           |                                                                                                                                                                                                                                                                                                                           |
|---------------------------|-----------------|-------|----------------------------------------------------------------------------------------------------|------------------------------------------------------------------------------------------------------------------------------------------------------|---------------------------------------------------------------------------------------------------------------------------|---------------------------------------------------------------------------------------------------------------------------------------------------------------------------------------------------------------------------------------------------------------------------------------------------------------------------|
| Hughes et al (2020) (44)  | Mixed methods   | UK    | 156 high-risk individuals and a further 1,217 vulnerable patients over the age of 70               | Can medical students (general practitioner trainees) use tele-consultations to assess the needs of patients and support digital access to healthcare | Descriptive statistical analysis. Thematic analysis of conversations issues arising, no theoretical framework named       | A total of 22% high risk patients and 44% of vulnerable patients reported connectivity issues. Participants reported that were confident in ordering medication online.                                                                                                                                                   |
| Runfola et al (2020) (50) | Cohort study    | Italy | 33 Bariatric outpatients                                                                           | What are the characteristics of patients that completed a telemedicine consultation                                                                  | Categorical data was compared using the chi-square test. Continuous variables compared using the Student's <i>t</i> test. | 57.6% (19) completed the consultation. No significant differences were found between participants and non-participants in terms of age and gender.                                                                                                                                                                        |
| Weber et al (2020) (46)   | Cohort study    | USA   | 52,585 patients diagnosed with COVID-19                                                            | What are the characteristics of patients that access care by tele-medicine, ER or office visit                                                       | Descriptive statistics and multinomial regression analysis                                                                | White patients had the highest predicted probabilities of using telehealth (46.7%) Black and Hispanic patients over 65 have lowest predicted probability (11.3%)                                                                                                                                                          |
| Whaley et al (2020) (47)  | Cross-sectional | USA   | Data from 5.6 to 6.8 million US individuals with employer health insurance between 2018, and 2020, | What are the characteristics of patients that use telemedicine.                                                                                      | Logistic regression                                                                                                       | Patients living in post codes with lower-income or majority racial/ethnic minority populations had lower rates of adoption of telemedicine; $\geq 80\%$ racial/ethnic minority post code: -71.6 per 10 000 (95% CI, -87.6 to -55.5); 79%-21% racial/ethnic minority post code: -15.1 per 10 000 (95% CI, -19.8 to -10.4). |

### Digital Access

We identified one study concerned with the access of digital technologies, specifically the reliability of internet connectivity. It was conducted in United Kingdom (UK) primary care as part of a study whose overall aim was to explore whether vulnerable patients might be usefully supported by tele-coaching in the use of digital health technologies, in this instance by General Practitioner (GP) trainees (44). As part of these conversations a direct question was asked around internet connectivity and the authors reported that 22% of high- risk patients and 44% of vulnerable patients reported issues (44).

### Digital Literacy

A total of seven studies addressed the domain of Digital Literacy and in particular an individual's digital skill set, specifically in relation to the ways in which they accessed care. All provided comparisons of use between groups using descriptions of demographic characteristics that included age, gender and ethnicity (53). Two studies used routinely collected electronic health data, though were conducted independently of each other, at two different sites in New York (United States); Chunura et al (2020) used data gathered from patients at New York University Hospital collected over a 6-week period to determine whether they had received their COVID-19 diagnosis at an office visit or via video consultation. The authors described that the digital infrastructure of the service was well resourced and established and therefore attributed the reduced utilization of telemedicine by black patients to factors unrelated to the digital capacity of the facility (45). The second study set in New York was also situated within a large health care centre and again compared the means of accessing healthcare between ethnic groups within the early months of the pandemic (46). They found that black and Hispanic patients were more likely to visit the Emergency Room or arrange an office visit than use telehealth than their white or Asian

1  
2  
3 counterparts (46). In this instance the authors recognised that the more extensive use of ER may be  
4  
5 due to the disproportionate number of ethnic minorities that experienced severe COVID-related  
6  
7 symptoms (46). Another study set in the United States compared the use of telemedicine amongst  
8  
9 commercially insured patients from 2018 through to 2020 (47). In doing so they explored  
10  
11 differences in both the nature of the care they received and the means of access in the first two  
12  
13 months of the pandemic and described that though there was an increase in telemedicine it did not  
14  
15 make up the shortfall in the number of visits in comparison to the usual levels of assessing  
16  
17 preventative or elective care amongst ethnic minorities (47). Campos-Castilo and Anthony  
18  
19 conducted a secondary analysis of a national survey a secondary analysis of cross-sectional survey  
20  
21 data from the Pew Research Center's American Trends Panel, which is a national, probability-based  
22  
23 online panel of adults (18 or older) living in US households exploring self-reported use of  
24  
25 telemedicine and following adjustment for socio-economic status (SES), age and perceived level of  
26  
27 threat to their health from the pandemic (no threat, minor, or major) (49). They found black  
28  
29 patients were actually more likely to contact care providers using ICTs if they perceived their health  
30  
31 was threatened by the virus (49).  
32  
33  
34  
35  
36  
37  
38  
39  
40

41 Two studies specifically explored whether there were differences in the characteristics of patients  
42  
43 fulfilling pre-arranged or routine video-consultations during the pandemic. One of these studies  
44  
45 was also set in the USA and compared the characteristics of cardiovascular patients that 'attended'  
46  
47 teleconsultations and found no differences in cancellation rates based on race, ethnicity, or  
48  
49 household income. However, differences between genders were observed with those completing  
50  
51 telemedicine tending to be male and older (48). In Italy Runfola et al explored the utilisation and  
52  
53 subsequent satisfaction with video consultations amongst a group of bariatric patients. They found  
54  
55 no significant differences in terms age or gender between those that succeeded or failed to  
56  
57 complete a video call (50). However, in terms of overall numbers just under 58% of patients  
58  
59  
60



1  
2  
3 fulfilled the video-consultation and the authors felt that this was due to the absence of basic  
4  
5 computer skills and a lack of self-efficacy in utilising video-call systems (50). In relation to self-  
6  
7 efficacy the Hughes study set in the UK also assessed vulnerable patients' confidence and ability to  
8  
9 order medications online and reported they were comfortable and confident with the process (44).  
10  
11  
12  
13  
14  
15

### 16 **Digital Assimilation**

17  
18  
19 Two studies explored the use of digital technologies in relation to maintaining or interacting with a  
20  
21 social network. One study set in Italy described how feelings of loneliness, boredom and irritability  
22  
23 were all reduced as a result of regular utilisation of video calls, and the positive effects on  
24  
25 maintaining meaningful relationships and mental health (51). Meanwhile in the United States  
26  
27 another secondary analysis of the same cross-sectional survey data from the Pew Research  
28  
29 Center's American Trends Panel, was conducted to understand if there were differences in the  
30  
31 characteristics of individuals that posted Covid-19 related content to social media platforms (52).  
32  
33  
34 The authors discovered that proportionally members of racial and ethnic minority groups and  
35  
36 amongst these older black males, were the most likely to contribute Covid-19 related content (52).  
37  
38  
39  
40  
41  
42  
43  
44  
45  
46  
47  
48  
49  
50  
51  
52  
53  
54  
55  
56  
57  
58  
59  
60

## Discussion

### *General findings*

Our rapid review identified how pre-existing societal disparities in access to and utilisation of health-related digital technologies were accentuated by COVID-19. We identified nine studies that explored various constructs within the three domains of our novel digital divide framework. In relation to Digital Access, poor internet access amongst the elderly was reported (44), as regards Digital Literacy lower levels of take-up of telemedicine amongst certain communities in the United States were described particularly among black and Hispanic patients (46-49). Within the domain of Digital Assimilation one study described how face-time technology can sustain relationships amongst dislocated peer groups (50), and another how black and elderly males, previously considered a group unprepared to share health information on social media platforms were the demographic most likely to post content on the pandemic, an important consideration in understanding the emerging scepticism of the COVID vaccine in ethnic groups (51).

That our search uncovered so few studies can be attributed to two factors relating to the pandemic; first that the research capacity of healthcare organisations would have been compromised by dealing with the exceptional demand on their services (54, 55); second that the issue of the 'digital divide' which had previously failed to be considered a priority was unlikely to be addressed during the most serious public health crisis in a generation (56).

### **Strengths and weaknesses**

Although our search initially uncovered numerous titles many were opinion or editorial pieces, demonstrating how widely recognised the phenomenon of the digital divide is but also its lack of

1  
2  
3 priority as a subject for original research (22, 26, 57-59). Though the studies identified were  
4  
5 conducted within only three countries to date they constituted three of the top four worst death  
6  
7 rates *per capita* from COVID-19 (60, 61). All offered valuable insight into how the digital divide was  
8  
9 reflected in the early stages of the pandemic though the lack of a theoretical underpinning limited  
10  
11 generalisability (61) and that two of the studies relied on self-reported data (44, 49) raises familiar  
12  
13 issues regards their reliability (62).  
14  
15  
16  
17  
18  
19  
20

### 21 *Specific findings*

#### 22 23 **Digital Access**

24  
25  
26 The Hughes paper provides the latest example of how discrepancies in reliable internet  
27  
28 connectivity continue in England (44, 63) findings which were corroborated by the most recent  
29  
30 surveys of digital access conducted in the UK which found that nearly 7% of homes in England and  
31  
32 Wales did not have a reliable internet connection (64, 65), a lack of connectivity that  
33  
34 disproportionately affected the elderly, those of lower socio-economic status, and the disabled (64-  
35  
36 67).  
37  
38  
39  
40  
41  
42  
43

44 Despite the calls to harness digital technologies on a global scale (5, 68), these also need to address  
45  
46 the stubborn differences in digital access that remain within the developed world where significant  
47  
48 divisions in digital connectivity and utility remain and continue to affect the most vulnerable  
49  
50 members of society (8, 68-77). The pandemic prompted broader acknowledgement of these  
51  
52 differences in several health economies where a number of initiatives were introduced (59, 78). For  
53  
54 example in the UK broadband providers lowered prices and reduced data caps for the vulnerable  
55  
56 (79), and in the United States roving buses were used to provide Wi-Fi access for unconnected  
57  
58 communities (80).  
59  
60

## Digital Literacy

The patterns in digital literacy relating to socio-economic status, age, or race described in four of the studies we identified (45, 46, 48, 49) have been observed for nearly three decades (8, 16-18, 66, 67, 81-83). However, prior to the pandemic, using traditional methods of in-person access did not hold the same degree of risk as during a pandemic where airborne transmission led to widespread recommendations to minimise social contact(32). This may be due in part to variations in individual perception of risk influenced by personal experience, social values, and the attitudes of friends and family (84). It also reflects the resistance of the digital divide to intervention. A number of previous attempts have been made to connect less technologically enabled patients to the appropriate care (58, 85, 86). However, the non-adoption and abandonment of telehealth technologies by the intended users is common (87-90) complicated by the influences of the provider organisation and the design and compatibility of the intervention (91). Self-efficacy, patient activation and motivation are also critical yet underexplored components of the uptake of digital technology (92) as are the impact of patients' knowledge of their condition; the expectations of the care they should receive, their social situation and the resources at their disposal (93).

In attempting to unpick this complexity a number of theoretical frameworks have been developed intended to support adoption and produce transferable learning for a range of digital innovations (94). There have also been calls for greater patient and public involvement in designing and developing digital healthcare to ensure the needs and preferences of the full range of patients are incorporated (95, 96).

## Digital Assimilation

1  
2  
3 For over a decade the internet has been recognised as a key source of health information for the  
4 public and patients, yet the precise role of social media in the communication of health-related  
5 information is less clear (97). Although limited, evidence tended to suggest that sharing health  
6 information online was favoured by the young (98) and was less so amongst the elderly or those of  
7 lower SES (99). However, one study we found described how older black males were more likely to  
8 share information about COVID through social media channels than other demographic groups  
9 (52). This may in part be due to the growing reluctance amongst black and ethnic minority groups  
10 to trust information provided by healthcare professionals or the mainstream media (100-102). That  
11 highlights how the growing consumption of health information through a largely unregulated  
12 network of social media platforms can have serious repercussions for public health (102-106). This  
13 is of particular concern when placed in the context of the growing scepticism about the COVID-19  
14 vaccine in minority communities (107, 108).

15  
16  
17  
18  
19  
20  
21  
22  
23  
24  
25  
26  
27  
28  
29  
30  
31  
32  
33  
34 Despite the potential for spreading misinformation the work by Runfola observed benefits for  
35 mental health from the use of face-to-face digital contact during the pandemic (50). The last five  
36 years has seen a growing realisation that the responsible use of social media can be an effective  
37 means of alleviating depression and social isolation and improve mental well-being (109-111). In  
38 particular the utilisation of face-time technologies has been shown to increase and enhance social  
39 interactions (112) and engagement (113). During the pandemic these benefits were recognised by  
40 the UK government in their scheme that provided free tablets to care homes to help connect  
41 isolating residents with their families and loved ones (114).

## 52 53 54 55 56 **Conclusions**

1  
2  
3 The rapid incorporation of digital technologies into mainstream health care delivery due to the  
4 COVID pandemic was widely understood and accepted by patients unwilling to breach social  
5 distancing advice. However, not all patient groups were either willing or able to utilise the digital  
6 services made available nor maximise the reported benefits of face-time technology to alleviate the  
7 effects of isolation. Our findings provide further evidence that patient engagement with any model  
8 of digital healthcare is vulnerable to complex socio-political factors. If more are to reap the  
9 potential benefits of digital healthcare then not only are acknowledged improvements in  
10 infrastructure needed but also concerted efforts to train, equip and motivate all patients in its use.  
11  
12  
13  
14  
15  
16  
17  
18  
19  
20  
21  
22  
23  
24

#### 25 **Ethics statement**

26 Ethical approval was not required  
27  
28  
29  
30  
31

#### 32 **Data Sharing Statement**

33 No additional data is available for sharing.  
34  
35  
36  
37  
38  
39  
40

#### 41 **Funding**

42 The work was not externally funded  
43  
44

#### 45 **Conflicts of interest**

46 There are no conflicts of interest  
47  
48

#### 49 **Author's contribution**

50  
51 IL was responsible for the conception of the work and the design of the review. IL and SG reviewed  
52 the articles and IL led the drafting of the article with input from SG and DS. SG and DS all provided  
53 critical revisions. The final version was drafted by IL and approved by SG ad DS.  
54  
55  
56  
57  
58  
59  
60

### Statement

I, the Submitting Author has the right to grant and does grant on behalf of all authors of the Work (as defined in the below author licence), an exclusive licence and/or a non-exclusive licence for contributions from authors who are: i) UK Crown employees; ii) where BMJ has agreed a CC-BY licence shall apply, and/or iii) in accordance with the terms applicable for US Federal Government officers or employees acting as part of their official duties; on a worldwide, perpetual, irrevocable, royalty-free basis to BMJ Publishing Group Ltd ("BMJ") its licensees and where the relevant Journal is co-owned by BMJ to the co-owners of the Journal, to publish the Work in BMJ Quality & Safety and any other BMJ products and to exploit all rights, as set out in our licence.

The Submitting Author accepts and understands that any supply made under these terms is made by BMJ to the Submitting Author unless you are acting as an employee on behalf of your employer or a postgraduate student of an affiliated institution which is paying any applicable article publishing charge ("APC") for Open Access articles. Where the Submitting Author wishes to make the Work available on an Open Access basis (and intends to pay the relevant APC), the terms of reuse of such Open Access shall be governed by a Creative Commons licence – details of these licences and which Creative Commons licence will apply to this Work are set out in our licence referred to above.

## Reference List

1. Bhavnani SP, Narula J, Sengupta PP. Mobile technology and the digitization of healthcare. *Eur Heart J*. 2016;37(18):1428-38.
2. Pagliari C, Detmer D, Singleton P. Potential of electronic personal health records. *BMJ*. 2007;335(7615):330.
3. Maisonneuve Cdl, Martins JO. The future of health and long-term care spending. 2014.
4. Rimmer A. Technology will improve doctors' relationships with patients, says Topol review. *BMJ*. 2019;364:l661.
5. World Health Organisation. Digital Health 2020 [Available from: [https://www.who.int/health-topics/digital-health#tab=tab\\_2](https://www.who.int/health-topics/digital-health#tab=tab_2)].
6. Reeves JJ, Ayers JW, Longhurst CA. Telehealth in the COVID-19 Era: A Balancing Act to Avoid Harm. *Journal of medical Internet research*. 2021;23(2):e24785-e.
7. Powell RE, Henstenburg JM, Cooper G, Hollander JE, Rising KL. Patient Perceptions of Telehealth Primary Care Video Visits. *Annals of family medicine*. 2017;15(3):225-9.
8. van Deursen AJAM, van Dijk JAGM. The first-level digital divide shifts from inequalities in physical access to inequalities in material access. *New Media & Society*. 2018;21(2):354-75.
9. Perrin A. Digital gap between rural and nonrural America persists. The Pew Research Centre; 2019.
10. Selwyn N. Reconsidering Political and Popular Understandings of the Digital Divide. *New Media & Society*. 2004;6(3):341-62.
11. Cullen R. The digital divide: a global and national call to action. *The Electronic Library*. 2003;21(3):247-57.
12. Scott Kruse C, Karem P, Shifflett K, Vegi L, Ravi K, Brooks M. Evaluating barriers to adopting telemedicine worldwide: A systematic review. *Journal of Telemedicine and Telecare*. 2016;24(1):4-12.
13. Fox NJ. Health sociology from post-structuralism to the new materialisms. *Health*. 2015;20(1):62-74.
14. van Dijk JAGM. Digital divide research, achievements and shortcomings. *Poetics*. 2006;34(4):221-35.
15. Lai J, Widmar NO. Revisiting the Digital Divide in the COVID-19 Era. *Applied Economic Perspectives and Policy*. 2020;n/a(n/a).
16. Evans C. The coronavirus crisis and the technology sector. *Business Economics*. 2020;55(4):253-66.
17. Thornton J. Covid-19: how coronavirus will change the face of general practice forever. *BMJ*. 2020;368:m1279.
18. Webster P. Virtual health care in the era of COVID-19. *Lancet*. 2020;395(10231):1180-1.
19. de Wet C, Bowie P, O'Donnell C. 'The big buzz': a qualitative study of how safe care is perceived, understood and improved in general practice. *BMC Family Practice*. 2018;19(1):83.
20. Kaufman G, McCaughan D. The effect of organisational culture on patient safety. *Nursing standard (Royal College of Nursing (Great Britain))* : 1987). 2013;27(43):50-6.
21. The Good Things Foundation. Digital Inclusion in Health and Care: Lessons learned from the NHS Widening Digital Participation Programme (2017-2020). 2020.
22. Watts G. COVID-19 and the digital divide in the UK. *Lancet Digit Health*. 2020;2(8):e395-e6.
23. Ramsetty A, Adams C. Impact of the digital divide in the age of COVID-19. *Journal of the American Medical Informatics Association*. 2020;27(7):1147-8.
24. De R, Pandey N, Pal A. Impact of digital surge during Covid-19 pandemic: A viewpoint on research and practice. *Int J Inf Manage*. 2020;55:102171-.
25. Scanzera AC, Kim SJ, Paul Chan RV. Teleophthalmology and the digital divide: inequities highlighted by the COVID-19 pandemic. *Eye*. 2020.



- 1
- 2
- 3
- 4 26. Lee JGL, LePrevost CE, Harwell EL, Bloss JE, Cofie LE, Wiggins MF, et al. Coronavirus
- 5 pandemic highlights critical gaps in rural Internet access for migrant and seasonal farmworkers: a
- 6 call for partnership with medical libraries. *J Med Libr Assoc.* 2020;108(4):651-5.
- 7 27. Martins Van Jaarsveld G. The Effects of COVID-19 Among the Elderly Population: A Case for
- 8 Closing the Digital Divide. *Frontiers in Psychiatry.* 2020;11(1211).
- 9 28. Seifert A, Batsis JA, Smith AC. Telemedicine in Long-Term Care Facilities During and Beyond
- 10 COVID-19: Challenges Caused by the Digital Divide. *Frontiers in Public Health.* 2020;8(690).
- 11 29. Visram S, Hussain W, Goddard A. Towards future healthcare that is digital by default.
- 12 *Future Healthc J.* 2020;7(3):180.
- 13 30. Langlois EV, Straus SE, Antony J, King VJ, Tricco AC. Using rapid reviews to strengthen
- 14 health policy and systems and progress towards universal health coverage. *BMJ Global Health.*
- 15 2019;4(1):e001178.
- 16 31. Moher D, Shamseer L, Clarke M, Ghersi D, Liberati A, Petticrew M, et al. Preferred reporting
- 17 items for systematic review and meta-analysis protocols (PRISMA-P) 2015 statement. *Syst Rev.*
- 18 2015;4(1):1-.
- 19 32. World Health Organisation. WHO announces COVID-19 outbreak a pandemic: World Health
- 20 Organisation; 2020 [Available from: [https://www.euro.who.int/en/health-topics/health-](https://www.euro.who.int/en/health-topics/health-emergencies/coronavirus-covid-19/news/news/2020/3/who-announces-covid-19-outbreak-a-pandemic)
- 21 [emergencies/coronavirus-covid-19/news/news/2020/3/who-announces-covid-19-outbreak-a-](https://www.euro.who.int/en/health-topics/health-emergencies/coronavirus-covid-19/news/news/2020/3/who-announces-covid-19-outbreak-a-pandemic)
- 22 [pandemic.](https://www.euro.who.int/en/health-topics/health-emergencies/coronavirus-covid-19/news/news/2020/3/who-announces-covid-19-outbreak-a-pandemic)
- 23 33. Ai-chi Loh Y CA. Reconsidering the Digital Divide: An analytical framework from access to
- 24 appropriation. the 69th Annual International Communication Association (ICA) Conference;;
- 25 Washington DC2019.
- 26 34. Wei K-K, Teo H-H, Chan HC, Tan BCY. Conceptualizing and Testing a Social Cognitive Model
- 27 of the Digital Divide. *Information Systems Research.* 2010;22(1):170-87.
- 28 35. Lim SS. Home, School, Borrowed, Public or Mobile: Variations in Young Singaporeans'
- 29 Internet Access and Their Implications. *Journal of Computer-Mediated Communication.*
- 30 2009;14(4):1228-56.
- 31 36. Brandtzæg PB. Towards a unified Media-User Typology (MUT): A meta-analysis and review
- 32 of the research literature on media-user typologies. *Computers in Human Behavior.*
- 33 2010;26(5):940-56.
- 34 37. Hargittai E, Piper AM, Morris MR. From internet access to internet skills: digital inequality
- 35 among older adults. *Universal Access in the Information Society.* 2019;18(4):881-90.
- 36 38. DiMaggio P, Hargittai E, Neuman WR, Robinson JP. Social Implications of the Internet.
- 37 *Annual Review of Sociology.* 2001;27(1):307-36.
- 38 39. Fernández-de-Álava M, Quesada-Pallarès C, García-Carmona M. Use of ICTs at work: an
- 39 intergenerational analysis in Spain / Uso de las TIC en el puesto de trabajo: un análisis
- 40 intergeneracional en España. *Culture and Education.* 2017;29(1):120-50.
- 41 40. Kirk CP, Swain SD, Gaskin JE. I'm Proud of It: Consumer Technology Appropriation and
- 42 Psychological Ownership. *Journal of Marketing Theory and Practice.* 2015;23(2):166-84.
- 43 41. Stewart J. The social consumption of information and communication technologies (ICTs):
- 44 insights from research on the appropriation and consumption of new ICTs in the domestic
- 45 environment. *Cognition, Technology & Work.* 2003;5:4-14.
- 46 42. Selwyn N, Gorard S, Furlong J. Whose Internet is it Anyway?: Exploring Adults' (Non)Use of
- 47 the Internet in Everyday Life. *European Journal of Communication.* 2005;20(1):5-26.
- 48 43. Haugerud T. Student Teachers Learning to Teach: The Mastery and Appropriation of Digital
- 49 Technology. *Nordic Journal of Digital Literacy.* 2011;6(4):226-38.
- 50 44. Hughes T, Beard E, Bowman A, Chan J, Gadsby K, Hughes M, et al. Medical student support
- 51 for vulnerable patients during COVID-19 - a convergent mixed-methods study. *BMC Med Educ.*
- 52 2020;20(1):377.
- 53
- 54
- 55
- 56
- 57
- 58
- 59
- 60

- 1
  - 2
  - 3
  - 4
  - 5
  - 6
  - 7
  - 8
  - 9
  - 10
  - 11
  - 12
  - 13
  - 14
  - 15
  - 16
  - 17
  - 18
  - 19
  - 20
  - 21
  - 22
  - 23
  - 24
  - 25
  - 26
  - 27
  - 28
  - 29
  - 30
  - 31
  - 32
  - 33
  - 34
  - 35
  - 36
  - 37
  - 38
  - 39
  - 40
  - 41
  - 42
  - 43
  - 44
  - 45
  - 46
  - 47
  - 48
  - 49
  - 50
  - 51
  - 52
  - 53
  - 54
  - 55
  - 56
  - 57
  - 58
  - 59
  - 60
45. Chunara R, Zhao Y, Chen J, Lawrence K, Testa PA, Nov O, et al. Telemedicine and healthcare disparities: a cohort study in a large healthcare system in New York City during COVID-19. *Journal of the American Medical Informatics Association*. 2020.
46. Weber E, Miller SJ, Astha V, Janevic T, Benn E. Characteristics of Telehealth Users in NYC for COVID-related Care during the Coronavirus Pandemic. *J Am Med Inform Assoc*. 2020.
47. Whaley CM, Pera MF, Cantor J, Chang J, Velasco J, Hagg HK, et al. Changes in Health Services Use Among Commercially Insured US Populations During the COVID-19 Pandemic. *JAMA Netw Open*. 2020;3(11):e2024984.
48. Eberly LA, Khatana SAM, Nathan AS, Snider C, Julien HM, Deleener ME, et al. Telemedicine Outpatient Cardiovascular Care During the COVID-19 Pandemic: Bridging or Opening the Digital Divide? *Circulation*. 2020;142(5):510-2.
49. Campos-Castillo C, Anthony D. Racial and ethnic differences in self-reported telehealth use during the COVID-19 pandemic: a secondary analysis of a US survey of internet users from late March. *Journal of the American Medical Informatics Association*. 2020.
50. Runfola M, Fantola G, Pintus S, Iafrancesco M, Moroni R. Telemedicine Implementation on a Bariatric Outpatient Clinic During COVID-19 Pandemic in Italy: an Unexpected Hill-Start. *Obes Surg*. 2020;30(12):5145-9.
51. Gabbiadini A, Baldissarri C, Durante F, Valtorta RR, De Rosa M, Gallucci M. Together Apart: The Mitigating Role of Digital Communication Technologies on Negative Affect During the COVID-19 Outbreak in Italy. *Front Psychol*. 2020;11:554678.
52. Campos-Castillo C, Laestadius LI. Racial and Ethnic Digital Divides in Posting COVID-19 Content on Social Media Among US Adults: Secondary Survey Analysis. *J Med Internet Res*. 2020;22(7):e20472.
53. Lal Dey B, Binsardi B, Prendergast R, Saren M. A qualitative enquiry into the appropriation of mobile telephony at the bottom of the pyramid. *International Marketing Review*. 2013;30(4):297-322.
54. England N. Standard operating procedure for for general practice in the context of coronavirus (COVID-19) 2020 [Available from: <https://www.england.nhs.uk/coronavirus/publication/managing-coronavirus-covid-19-in-general-practice-sop/>].
55. Facher L. 9 ways Covid-19 may forever upend the U.S. health care industry 2020 [Available from: <https://www.statnews.com/2020/05/19/9-ways-covid-19-forever-upend-health-care/>].
56. D2N2. New European Social Fund call to help address the digital divide. 2020.
57. Allman K. 2020. [cited 2020].
58. Majid A. 2020. Available from: <https://blogs.bmj.com/bmj/2020/09/01/covid-19-is-magnifying-the-digital-divide/>.
59. Stanford University. Digital Divide 2020 [Available from: <https://cs.stanford.edu/people/eroberts/cs181/projects/digital-divide/start.html>].
60. Medicine JHUo. Mortality Analyses. 2021.
61. Davidoff F, Dixon-Woods M, Leviton L, Michie S. Demystifying theory and its use in improvement. *BMJ Quality & Safety*. 2015;24(3):228.
62. Jerolmack C, Khan S. Talk Is Cheap: Ethnography and the Attitudinal Fallacy. *Sociological Methods & Research*. 2014;43(2):178-209.
63. Clarke CS, Round J, Morris S, Kharicha K, Ford J, Manthorpe J, et al. Exploring the relationship between frequent internet use and health and social care resource use in a community-based cohort of older adults: an observational study in primary care. *BMJ open*. 2017;7(7):e015839.
64. Sweney M. Slow digital services are marginalising rural areas, MPs warn. *The Guardian*. 2019.
65. Oxford Internet Institute. Oxford Internet Surveys 2020 [Available from: <https://oxis.oii.ox.ac.uk/>].

- 1  
2  
3  
4  
5  
6  
7  
8  
9  
10  
11  
12  
13  
14  
15  
16  
17  
18  
19  
20  
21  
22  
23  
24  
25  
26  
27  
28  
29  
30  
31  
32  
33  
34  
35  
36  
37  
38  
39  
40  
41  
42  
43  
44  
45  
46  
47  
48  
49  
50  
51  
52  
53  
54  
55  
56  
57  
58  
59  
60
66. Lloyds Bank. Lloyds Bank UK Consumer Digital Index 2020 2020 [Available from: <https://www.lloydsbank.com/banking-with-us/whats-happening/consumer-digital-index.html>].
67. Office of National Statistics. Internet access – households and individuals, Great Britain: 2018 2019 [cited 2020 December]. Available from: <https://www.ons.gov.uk/peoplepopulationandcommunity/householdcharacteristics/homeinternetandsocialmediausage/bulletins/internetaccesshouseholdsandindividuals/2018>.
68. James J. The global digital divide in the Internet: developed countries constructs and Third World realities. *Journal of Information Science*. 2005;31(2):114-23.
69. Kulkarni M. Digital accessibility: Challenges and opportunities. *IIMB Management Review*. 2019;31(1):91-8.
70. Rich MJ, Pather S. A response to the persistent digital divide: Critical components of a community network ecosystem. *Information Development*. 2020:0266666920924696.
71. BBC. 2020 [Available from: <https://www.bbc.co.uk/news/education-52399589>].
72. Helsper E, Galacz A. Understanding the links between social and digital inclusion in Europe. *The World Wide Internet: Changing Societies, Economies and Cultures*. 2009:146-78.
73. Vasilescu MD, Serban AC, Dimian GC, Aceleanu MI, Picatoste X. Digital divide, skills and perceptions on digitalisation in the European Union-Towards a smart labour market. *PLoS One*. 2020;15(4):e0232032.
74. Daniel E. Covid-19 highlights “crucial need” for digital infrastructure across the UK 2020 [Available from: <https://www.verdict.co.uk/uk-digital-infrastructure/>].
75. Ryseff J. 2020. [cited 2021].
76. Lustria ML, Smith SA, Hinnant CC. Exploring digital divides: an examination of eHealth technology use in health information seeking, communication and personal health information management in the USA. *Health Informatics J*. 2011;17(3):224-43.
77. Hilbert M. The end justifies the definition: The manifold outlooks on the digital divide and their practical usefulness for policy-making. *Telecommunications Policy*. 2011;35(8):715-36.
78. Nominet. Digital Access for All launches to help solve problem of digital exclusion 2020 [Available from: <https://www.nominet.uk/digital-access-for-all-launches-to-help-solve-problem-of-digital-exclusion/>].
79. Media P. Broadband providers to lift data caps during Covid-19 lockdown. *The Guardian*. 2020.
80. Brookings. What the coronavirus reveals about the digital divide between schools and communities 2020 [Available from: <https://www.brookings.edu/blog/techtank/2020/03/17/what-the-coronavirus-reveals-about-the-digital-divide-between-schools-and-communities/>].
81. Adler NE, Ostrove JM. Socioeconomic Status and Health: What We Know and What We Don't. *Annals of the New York Academy of Sciences*. 1999;896(1):3-15.
82. Stringhini S, Carmeli C, Jokela M, Avendaño M, Muennig P, Guida F, et al. Socioeconomic status and the 25 × 25 risk factors as determinants of premature mortality: a multicohort study and meta-analysis of 1.7 million men and women. *The Lancet*. 2017;389(10075):1229-37.
83. Keith RE, Crosson JC, O'Malley AS, Crompton D, Taylor EF. Using the Consolidated Framework for Implementation Research (CFIR) to produce actionable findings: a rapid-cycle evaluation approach to improving implementation. *Implementation Science*. 2017;12(1):15.
84. Dryhurst S, Schneider CR, Kerr J, Freeman ALJ, Recchia G, van der Bles AM, et al. Risk perceptions of COVID-19 around the world. *Journal of Risk Research*. 2020;23(7-8):994-1006.
85. Makri A. Bridging the digital divide in health care. *The Lancet Digital Health*. 2019;1(5):e204-e5.
86. Protheroe J, Whittle R, Bartlam B, Estacio EV, Clark L, Kurth J. Health literacy, associated lifestyle and demographic factors in adult population of an English city: a cross-sectional survey. *Health expectations : an international journal of public participation in health care and health policy*. 2017;20(1):112-9.

- 1  
2  
3 87. Bentley CL, Powell LA, Orrell A, Mountain GA. Addressing design and suitability barriers to  
4 Telecare use: Has anything changed? *Technology and Disability*. 2014;26:221-35.  
5  
6 88. Clark J, McGee-Lennon M. A stakeholder-centred exploration of the current barriers to the  
7 uptake of home care technology in the UK. *Journal of Assistive Technologies*. 2011;5(1):12-25.  
8 89. Zanaboni P, Wootton R. Adoption of routine telemedicine in Norwegian hospitals: progress  
9 over 5 years. *BMC Health Serv Res*. 2016;16:496.  
10 90. Haidt J, Allen N. Scrutinizing the effects of digital technology on mental health. *Nature*.  
11 2020;578(7794):226-7.  
12 91. Cherns A. Principles of Sociotechnical Design Revisted. *Human Relations*. 1987;40(3):153-  
13 61.  
14 92. Chalfont G, Mateus C, Varey S, Milligan C. Self-Efficacy of Older People Using Technology to  
15 Self-Manage COPD, Hypertension, Heart Failure, or Dementia at Home: An Overview of Systematic  
16 Reviews. *The Gerontologist*. 2020.  
17 93. Gilbert AW, Jones J, Stokes M, May CR. Factors that influence patient preferences for  
18 virtual consultations in an orthopaedic rehabilitation setting: a qualitative study. *BMJ open*.  
19 2021;11(2):e041038.  
20 94. Greenhalgh T, Wherton J, Papoutsi C, Lynch J, Hughes G, A'Court C, et al. Beyond Adoption:  
21 A New Framework for Theorizing and Evaluating Nonadoption, Abandonment, and Challenges to  
22 the Scale-Up, Spread, and Sustainability of Health and Care Technologies. *J Med Internet Res*.  
23 2017;19(11):e367.  
24 95. Islind AS, Lindroth T, Lundin J, Steineck G. Co-designing a digital platform with boundary  
25 objects: bringing together heterogeneous users in healthcare. *Health and Technology*.  
26 2019;9(4):425-38.  
27 96. NHS Digital. Digital inclusion in health and social care 2020 [Available from:  
28 [https://digital.nhs.uk/about-nhs-digital/our-work/digital-inclusion/digital-inclusion-in-health-and-  
29 social-care](https://digital.nhs.uk/about-nhs-digital/our-work/digital-inclusion/digital-inclusion-in-health-and-social-care).  
30 97. Hesse BW, Moser RP, Rutten LJ. Surveys of physicians and electronic health information. *N*  
31 *Engl J Med*. 2010;362(9):859-60.  
32 98. Huo J, Desai R, Hong Y-R, Turner K, Mainous AG, 3rd, Bian J. Use of Social Media in Health  
33 Communication: Findings From the Health Information National Trends Survey 2013, 2014, and  
34 2017. *Cancer Control*. 2019;26(1):1073274819841442-.  
35 99. Calixte R, Rivera A, Oridota O, Beauchamp W, Camacho-Rivera M. Social and Demographic  
36 Patterns of Health-Related Internet Use Among Adults in the United States: A Secondary Data  
37 Analysis of the Health Information National Trends Survey. *Int J Environ Res Public Health*.  
38 2020;17(18):6856.  
39 100. Glik DC. Risk communication for public health emergencies. *Annu Rev Public Health*.  
40 2007;28:33-54.  
41 101. Ranjit YS, Lachlan KA, Basaran A-MB, Snyder LB, Houston JB. Needing to know about the  
42 crisis back home: Disaster information seeking and disaster media effects following the 2015 Nepal  
43 earthquake among Nepalis living outside of Nepal. *International Journal of Disaster Risk Reduction*.  
44 2020;50:101725.  
45 102. Smailhodzic E, Hooijsma W, Boonstra A, Langley DJ. Social media use in healthcare: A  
46 systematic review of effects on patients and on their relationship with healthcare professionals.  
47 *BMC Health Services Research*. 2016;16(1):442.  
48 103. Garfin DR. Technology as a coping tool during the coronavirus disease 2019 (COVID-19)  
49 pandemic: Implications and recommendations. *Stress Health*. 2020;36(4):555-9.  
50 104. Phelan JC, Link BG, Diez-Roux A, Kawachi I, Levin B. "Fundamental causes" of social  
51 inequalities in mortality: a test of the theory. *J Health Soc Behav*. 2004;45(3):265-85.  
52 105. Phelan JC, Link BG. Is Racism a Fundamental Cause of Inequalities in Health? *Annual Review*  
53 *of Sociology*. 2015;41(1):311-30.  
54  
55  
56  
57  
58  
59  
60

- 1  
2  
3 106. Phelan JC, Link BG, Tehranifar P. Social conditions as fundamental causes of health  
4 inequalities: theory, evidence, and policy implications. *J Health Soc Behav.* 2010;51 Suppl:S28-40.  
5 107. [cited 2020 December]. Available from: [https://www.bristolpost.co.uk/news/bristol-](https://www.bristolpost.co.uk/news/bristol-news/bristol-tackle-skepticism-covid-19-4804469)  
6 [news/bristol-tackle-skepticism-covid-19-4804469](https://www.bristolpost.co.uk/news/bristol-tackle-skepticism-covid-19-4804469) [https://www.cbsnews.com/news/covid-19-](https://www.cbsnews.com/news/covid-19-vaccine-why-some-black-americans-skeptical/)  
7 [vaccine-why-some-black-americans-skeptical/](https://www.cbsnews.com/news/covid-19-vaccine-why-some-black-americans-skeptical/).  
8 108. Jones Z. Why some black americans are sceptical of the covid-19 vaccine 2020 [  
9 109. Seabrook EM, Kern ML, Rickard NS. Social Networking Sites, Depression, and Anxiety: A  
10 Systematic Review. *JMIR Ment Health.* 2016;3(4):e50.  
11 110. Choi NG, Marti CN, Bruce ML, Hegel MT, Wilson NL, Kunik ME. Six-month postintervention  
12 depression and disability outcomes of in-home telehealth problem-solving therapy for depressed,  
13 low-income homebound older adults. *Depress Anxiety.* 2014;31(8):653-61.  
14 111. Naslund JA, Aschbrenner KA, Marsch LA, Bartels SJ. The future of mental health care: peer-  
15 to-peer support and social media. *Epidemiol Psychiatr Sci.* 2016;25(2):113-22.  
16 112. Mickus MA, Luz CC. Televisits: sustaining long distance family relationships among  
17 institutionalized elders through technology. *Aging Ment Health.* 2002;6(4):387-96.  
18 113. Porges SW. Social engagement and attachment: a phylogenetic perspective. *Ann N Y Acad*  
19 *Sci.* 2003;1008:31-47.  
20 114. NHSx. Care homes to benefit from tech to help residents keep in touch with loved ones  
21 2020 [Available from: [https://www.nhs.uk/news/care-homes-benefit-tech-help-residents-](https://www.nhs.uk/news/care-homes-benefit-tech-help-residents-keep-touch-loved-ones/)  
22 [keep-touch-loved-ones/](https://www.nhs.uk/news/care-homes-benefit-tech-help-residents-keep-touch-loved-ones/).  
23  
24  
25  
26  
27  
28  
29  
30  
31  
32  
33  
34  
35  
36  
37  
38  
39  
40  
41  
42  
43  
44  
45  
46  
47  
48  
49  
50  
51  
52  
53  
54  
55  
56  
57  
58  
59  
60

Figure I PRISMA diagram

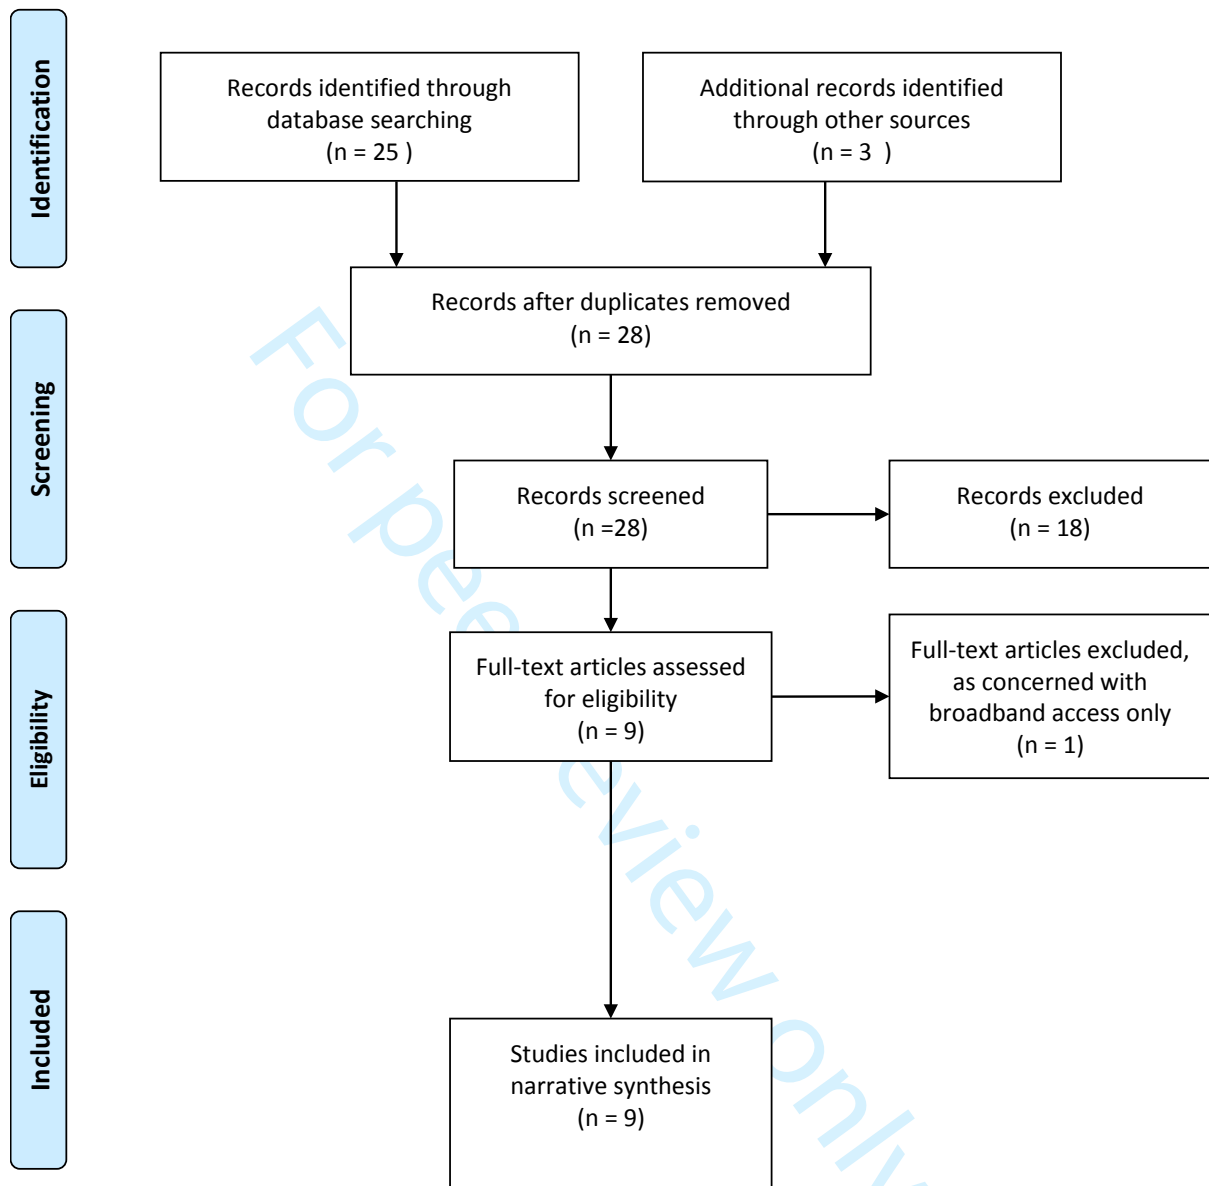

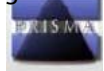

## PRISMA 2020 Checklist

| Section and Topic             | Item # | Checklist item                                                                                                                                                                                                                                                                                       | Location where item is reported |
|-------------------------------|--------|------------------------------------------------------------------------------------------------------------------------------------------------------------------------------------------------------------------------------------------------------------------------------------------------------|---------------------------------|
| <b>TITLE</b>                  |        |                                                                                                                                                                                                                                                                                                      |                                 |
| Title                         | 1      | Identify the report as a systematic review.                                                                                                                                                                                                                                                          | Title                           |
| <b>ABSTRACT</b>               |        |                                                                                                                                                                                                                                                                                                      |                                 |
| Abstract                      | 2      | See the PRISMA 2020 for Abstracts checklist.                                                                                                                                                                                                                                                         | N/A                             |
| <b>INTRODUCTION</b>           |        |                                                                                                                                                                                                                                                                                                      |                                 |
| Rationale                     | 3      | Describe the rationale for the review in the context of existing knowledge.                                                                                                                                                                                                                          | Pages 4/5                       |
| Objectives                    | 4      | Provide an explicit statement of the objective(s) or question(s) the review addresses.                                                                                                                                                                                                               | Page 5                          |
| <b>METHODS</b>                |        |                                                                                                                                                                                                                                                                                                      |                                 |
| Eligibility criteria          | 5      | Specify the inclusion and exclusion criteria for the review and how studies were grouped for the syntheses.                                                                                                                                                                                          | Page 6                          |
| Information sources           | 6      | Specify all databases, registers, websites, organisations, reference lists and other sources searched or consulted to identify studies. Specify the date when each source was last searched or consulted.                                                                                            | Page 6                          |
| Search strategy               | 7      | Present the full search strategies for all databases, registers and websites, including any filters and limits used.                                                                                                                                                                                 | Page 6                          |
| Selection process             | 8      | Specify the methods used to decide whether a study met the inclusion criteria of the review, including how many reviewers screened each record and each report retrieved, whether they worked independently, and if applicable, details of automation tools used in the process.                     | Page 7                          |
| Data collection process       | 9      | Specify the methods used to collect data from reports, including how many reviewers collected data from each report, whether they worked independently, any processes for obtaining or confirming data from study investigators, and if applicable, details of automation tools used in the process. | Page 7                          |
| Data items                    | 10a    | List and define all outcomes for which data were sought. Specify whether all results that were compatible with each outcome domain in each study were sought (e.g. for all measures, time points, analyses), and if not, the methods used to decide which results to collect.                        | N/A                             |
|                               | 10b    | List and define all other variables for which data were sought (e.g. participant and intervention characteristics, funding sources). Describe any assumptions made about any missing or unclear information.                                                                                         | N/A                             |
| Study risk of bias assessment | 11     | Specify the methods used to assess risk of bias in the included studies, including details of the tool(s) used, how many reviewers assessed each study and whether they worked independently, and if applicable, details of automation tools used in the process.                                    | N/A                             |
| Effect measures               | 12     | Specify for each outcome the effect measure(s) (e.g. risk ratio, mean difference) used in the synthesis or presentation of results.                                                                                                                                                                  | N/A                             |
| Synthesis methods             | 13a    | Describe the processes used to decide which studies were eligible for each synthesis (e.g. tabulating the study intervention characteristics and comparing against the planned groups for each synthesis (item #5)).                                                                                 | N/A                             |
|                               | 13b    | Describe any methods required to prepare the data for presentation or synthesis, such as handling of missing summary statistics, or data conversions.                                                                                                                                                | N/A                             |
|                               | 13c    | Describe any methods used to tabulate or visually display results of individual studies and syntheses.                                                                                                                                                                                               | N/A                             |
|                               | 13d    | Describe any methods used to synthesize results and provide a rationale for the choice(s). If meta-analysis was performed, describe the model(s), method(s) to identify the presence and extent of statistical heterogeneity, and software package(s) used.                                          | N/A                             |
|                               | 13e    | Describe any methods used to explore possible causes of heterogeneity among study results (e.g. subgroup analysis, meta-regression).                                                                                                                                                                 | N/A                             |
|                               | 13f    | Describe any sensitivity analyses conducted to assess robustness of the synthesized results.                                                                                                                                                                                                         | N/A                             |
| Reporting bias assessment     | 14     | Describe any methods used to assess risk of bias due to missing results in a synthesis (arising from reporting biases).                                                                                                                                                                              | N/A                             |
| Certainty assessment          | 15     | Describe any methods used to assess certainty (or confidence) in the body of evidence for an outcome.                                                                                                                                                                                                | N/A                             |
| <b>RESULTS</b>                |        |                                                                                                                                                                                                                                                                                                      |                                 |

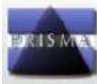

| Section and Topic                              | Item # | Checklist item                                                                                                                                                                                                                                                                       | Location where item is reported |
|------------------------------------------------|--------|--------------------------------------------------------------------------------------------------------------------------------------------------------------------------------------------------------------------------------------------------------------------------------------|---------------------------------|
| Study selection                                | 16a    | Describe the results of the search and selection process, from the number of records identified in the search to the number of studies included in the review, ideally using a flow diagram.                                                                                         | Page 27                         |
|                                                | 16b    | Cite studies that might appear to meet the inclusion criteria, but which were excluded, and explain why they were excluded.                                                                                                                                                          | Page 9                          |
| Study characteristics                          | 17     | Cite each included study and present its characteristics.                                                                                                                                                                                                                            | Page 8                          |
| Risk of bias in studies                        | 18     | Present assessments of risk of bias for each included study.                                                                                                                                                                                                                         | N/A                             |
| Results of individual studies                  | 19     | For all outcomes, present, for each study: (a) summary statistics for each group (where appropriate) and (b) an effect estimate and its precision (e.g. confidence/credible interval), ideally using structured tables or plots.                                                     | Page 8                          |
| Results of syntheses                           | 20a    | For each synthesis, briefly summarise the characteristics and risk of bias among contributing studies.                                                                                                                                                                               | N/A                             |
|                                                | 20b    | Present results of all statistical syntheses conducted. If meta-analysis was done, present for each the summary estimate and its precision (e.g. confidence/credible interval) and measures of statistical heterogeneity. If comparing groups, describe the direction of the effect. | N/A                             |
|                                                | 20c    | Present results of all investigations of possible causes of heterogeneity among study results.                                                                                                                                                                                       | N/A                             |
|                                                | 20d    | Present results of all sensitivity analyses conducted to assess the robustness of the synthesized results.                                                                                                                                                                           | N/A                             |
| Reporting biases                               | 21     | Present assessments of risk of bias due to missing results (arising from reporting biases) for each synthesis assessed.                                                                                                                                                              | NA                              |
| Certainty of evidence                          | 22     | Present assessments of certainty (or confidence) in the body of evidence for each outcome assessed.                                                                                                                                                                                  | Page 8                          |
| <b>DISCUSSION</b>                              |        |                                                                                                                                                                                                                                                                                      |                                 |
| Discussion                                     | 23a    | Provide a general interpretation of the results in the context of other evidence.                                                                                                                                                                                                    | Page 15                         |
|                                                | 23b    | Discuss any limitations of the evidence included in the review.                                                                                                                                                                                                                      | Pages 15/16                     |
|                                                | 23c    | Discuss any limitations of the review processes used.                                                                                                                                                                                                                                | Page 16                         |
|                                                | 23d    | Discuss implications of the results for practice, policy, and future research.                                                                                                                                                                                                       | Pages 16/19                     |
| <b>OTHER INFORMATION</b>                       |        |                                                                                                                                                                                                                                                                                      |                                 |
| Registration and protocol                      | 24a    | Provide registration information for the review, including register name and registration number, or state that the review was not registered.                                                                                                                                       | N/A                             |
|                                                | 24b    | Indicate where the review protocol can be accessed, or state that a protocol was not prepared.                                                                                                                                                                                       | N/A                             |
|                                                | 24c    | Describe and explain any amendments to information provided at registration or in the protocol.                                                                                                                                                                                      | N/A                             |
| Support                                        | 25     | Describe sources of financial or non-financial support for the review, and the role of the funders or sponsors in the review.                                                                                                                                                        | Page 19                         |
| Competing interests                            | 26     | Declare any competing interests of review authors.                                                                                                                                                                                                                                   | Page 19                         |
| Availability of data, code and other materials | 27     | Report which of the following are publicly available and where they can be found: template data collection forms; data extracted from included studies; data used for all analyses; analytic code; any other materials used in the review.                                           | N/A                             |

From: Page MJ, McKenzie JE, Bossuyt PM, Boutron I, Hoffmann TC, Mulrow CD, et al. The PRISMA 2020 statement: an updated guideline for reporting systematic reviews. *BMJ* 2021;372:n71. doi: 10.1136/bmj.n71

For more information, visit: <http://www.prisma-statement.org/>  
 For peer review only - <http://bmjopen.bmj.com/site/about/guidelines.xhtml>



# BMJ Open

## The impact of COVID-19 on the the digital divide: A rapid review

|                                 |                                                                                                                                                                                                                                                                                                                                                                             |
|---------------------------------|-----------------------------------------------------------------------------------------------------------------------------------------------------------------------------------------------------------------------------------------------------------------------------------------------------------------------------------------------------------------------------|
| Journal:                        | <i>BMJ Open</i>                                                                                                                                                                                                                                                                                                                                                             |
| Manuscript ID                   | bmjopen-2021-053440.R1                                                                                                                                                                                                                                                                                                                                                      |
| Article Type:                   | Original research                                                                                                                                                                                                                                                                                                                                                           |
| Date Submitted by the Author:   | 04-Aug-2021                                                                                                                                                                                                                                                                                                                                                                 |
| Complete List of Authors:       | Litchfield, Ian; University of Birmingham College of Medical and Dental Sciences, Institute of Applied Health Research<br>Shukla, David; University of Birmingham College of Medical and Dental Sciences, Institute of Applied Health Research<br>Greenfield, Sheila; University of Birmingham College of Medical and Dental Sciences, Institute of Applied Health Research |
| <b>Primary Subject Heading</b>: | Health services research                                                                                                                                                                                                                                                                                                                                                    |
| Secondary Subject Heading:      | Communication, Global health, Health policy, Patient-centred medicine                                                                                                                                                                                                                                                                                                       |
| Keywords:                       | COVID-19, Organisation of health services < HEALTH SERVICES ADMINISTRATION & MANAGEMENT, Quality in health care < HEALTH SERVICES ADMINISTRATION & MANAGEMENT                                                                                                                                                                                                               |
|                                 |                                                                                                                                                                                                                                                                                                                                                                             |

SCHOLARONE™  
Manuscripts



I, the Submitting Author has the right to grant and does grant on behalf of all authors of the Work (as defined in the below author licence), an exclusive licence and/or a non-exclusive licence for contributions from authors who are: i) UK Crown employees; ii) where BMJ has agreed a CC-BY licence shall apply, and/or iii) in accordance with the terms applicable for US Federal Government officers or employees acting as part of their official duties; on a worldwide, perpetual, irrevocable, royalty-free basis to BMJ Publishing Group Ltd ("BMJ") its licensees and where the relevant Journal is co-owned by BMJ to the co-owners of the Journal, to publish the Work in this journal and any other BMJ products and to exploit all rights, as set out in our [licence](#).

The Submitting Author accepts and understands that any supply made under these terms is made by BMJ to the Submitting Author unless you are acting as an employee on behalf of your employer or a postgraduate student of an affiliated institution which is paying any applicable article publishing charge ("APC") for Open Access articles. Where the Submitting Author wishes to make the Work available on an Open Access basis (and intends to pay the relevant APC), the terms of reuse of such Open Access shall be governed by a Creative Commons licence – details of these licences and which [Creative Commons](#) licence will apply to this Work are set out in our licence referred to above.

Other than as permitted in any relevant BMJ Author's Self Archiving Policies, I confirm this Work has not been accepted for publication elsewhere, is not being considered for publication elsewhere and does not duplicate material already published. I confirm all authors consent to publication of this Work and authorise the granting of this licence.

1  
2  
3 **The impact of COVID-19 on the digital divide: A rapid review**  
4  
5

6 **3500 words**  
7

8  
9 Ian Litchfield <sup>1§</sup>  
10

11  
12 David Shukla<sup>1</sup>  
13

14  
15 Sheila Greenfield<sup>1</sup>  
16  
17

18  
19  
20  
21  
22 1§ Corresponding author  
23

24 University of Birmingham College of Medical and Dental Sciences, Room 104, IOEM, Institute  
25 of Applied Health Research, Birmingham, UK B15 2TT  
26

27 Email [i.litchfield@bham.ac.uk](mailto:i.litchfield@bham.ac.uk)  
28  
29

30  
31 1. Institute of Applied Health Research, College of Medical and Dental Sciences, University of  
32 Birmingham, Birmingham, UK B15 2TT  
33  
34

35  
36  
37  
38  
39  
40 **Keywords**  
41

42 Digital divide; Health inequalities; COVID-19  
43  
44  
45  
46  
47  
48  
49  
50  
51  
52  
53  
54  
55  
56  
57  
58  
59  
60

**Abstract****Objective**

The increased reliance on digital technologies to deliver healthcare as a result of the COVID-19 pandemic has meant pre-existing disparities in digital access and utilisation of healthcare might be exacerbated in disadvantaged patient populations. The aim of this rapid review was to identify how this 'digital divide' was manifest during the first wave of the pandemic and highlight any areas which might be usefully addressed for the remainder of the pandemic and beyond.

**Design**

Rapid review and narrative synthesis

**Data sources**

The major medical databases including PubMed and Embase and Google Scholar were searched alongside a hand-search of bibliographies.

**Eligibility criteria**

Original research papers available in English which described studies conducted since the 1<sup>st</sup> of March 2020 until 31<sup>st</sup> July 2021.

**Results**

The search was described using PRISMA and identified nine studies. The results are presented within a refined framework describing the three key domains of the digital divide; 1) Digital Access, within which one study described continuing issues with internet connectivity amongst vulnerable patients in the UK. 2) Digital Literacy, where seven studies described how ethnic minorities and the elderly were less likely to use digital technologies in accessing care. 3) Digital Assimilation, where one study described how video technologies can reduce feelings of isolation and another how

1  
2  
3 elderly black males were the most likely group to share information about COVID-19 on social  
4  
5 media platforms.  
6  
7

## 8 **Conclusions**

9

10  
11 During the early phase of the pandemic in the developed world, familiar difficulties in utilisation of  
12  
13 digital healthcare amongst the elderly and ethnic minorities continued to be observed. This is a  
14  
15 further reminder that the digital divide is a persistent challenge that needs to be urgently  
16  
17 addressed when considering the likelihood that in many instances these digital technologies are  
18  
19 likely to remain at the centre of healthcare delivery.  
20  
21  
22  
23  
24  
25  
26

## 27 **Strengths and limitations of this study**

28

29  
30 This rapid review provides timely information on the impact of COVID-19 on the digital divide  
31  
32 during the first wave of the pandemic.  
33  
34

35 The findings were presented within a framework developed to provide a more comprehensive  
36  
37 context for this and future explorations of the digital divide.  
38  
39

40 The search covered three key databases and was augmented by manual searches though the  
41  
42 quality of the papers identified was not formally assessed.  
43  
44  
45  
46  
47  
48  
49  
50  
51  
52  
53  
54  
55  
56  
57  
58  
59  
60

## Introduction

A growing range of digital tools have been developed to help patients track their condition, connect with peer and clinical support, enable self-management, and aid more appropriate utilisation of health services (1, 2). When coordinated with the appropriate digital infrastructure they appear well placed to meet the need for more effective personalised healthcare, (3) that is capable of bridging the gap between increasing demand and restricted resource (4). The World Health Organisation's (WHO) recently launched global strategy for digital health confirmed the expected role of digital technologies in creating a more equitable future for healthcare by offering "effective clinical and public health solutions to accelerate the achievement of the health and well-being... leaving none behind, [whether] children or adults, rural or urban." (5).

Implicit within the digital transformation of healthcare and its role in reducing inequalities is that the relevant technologies are available across all levels of society (6, 7). However persistent discrepancies exist across geographies and between communities in how they access and utilise digital technologies, differences compounded by the growing sophistication in the functionality of devices and connectivity (8-10). The result is that comparative advantages continue to be afforded to those groups that can maximise the capabilities of digital technologies (11, 12). These societal differences in access and adoption are commonly referred to as the "digital divide" (12), a catch-all phrase which implies a simple dichotomy but in reality describes a complex range of users whose level of adoption changes over time influenced by infrastructure, socio-economic environment and individual characteristics such as educational background and physical disability (13-17).

Despite the acknowledged inequities in digital access and utilisation, measures introduced to reduce infection rates following the onset of the COVID- 19 pandemic in spring 2020, led to an

1  
2  
3 acceleration of the reliance on digital health technologies both in Europe and the United States of  
4  
5 America (6, 18-20). Because the spread of COVID-19 was so rapid many of these digital  
6  
7 interventions were introduced without the recommended periods of consultation and evaluation  
8  
9 (21, 22). This rapid introduction led to concerns that the new digitally reliant models of healthcare  
10  
11 delivery will disproportionately affect the health of disadvantaged communities (23-26) such as  
12  
13 ethnic minorities (27), rural populations (28), the elderly (29) and residents of care homes (30).  
14  
15 These concerns were heightened when it became apparent that the same groups on the “wrong”  
16  
17 side of the digital divide were the most likely to experience severe symptoms and higher levels of  
18  
19 mortality as a result of contracting the virus (23-26)  
20  
21  
22  
23  
24  
25  
26  
27

28 Many of these novel digitally-reliant processes that in March 2020 were considered a short-term fix  
29  
30 are now becoming embedded in existing systems of care in the United Kingdom and elsewhere (19,  
31  
32 31). Therefore it is important to understand the implications of these new systems for patients and  
33  
34 the quality and safety of the care they receive. This rapid review aims to explore how the digital  
35  
36 divide manifested during the first wave of COVID-19 generating knowledge that can improve digital  
37  
38 inclusion for the remainder of the pandemic and beyond.  
39  
40  
41  
42  
43  
44

## 45 **Methods**

### 46 *Study design*

47  
48  
49 Rapid reviews have previously been recommended by the WHO amongst others for their ability to  
50  
51 provide timely and credible evidence for policymakers and practitioners in what is a dynamic and  
52  
53 evolving public health crisis (32)(33). We have used many of the principles of a systematic review  
54  
55 process; our search terms were clearly defined using Boolean principles and the Preferred  
56  
57  
58  
59  
60

1  
2  
3 Reporting Items for Systematic Reviews and Meta-Analyses (PRISMA) described the search (34).  
4  
5 The inclusion and exclusion criteria were also clearly defined and two reviewers agreed on the  
6  
7 selection of the various papers (The search terms can be found in supplementary file 1). However  
8  
9 the systematic review process was expedited by amending several steps i.e. drawing only on the  
10  
11 major medical databases and forgoing a structured appraisal of the quality of selected studies in  
12  
13 place of a transparent description of the characteristics of each within the results.  
14  
15  
16  
17  
18  
19

20 The results are presented within the three key domains of a framework (informed by Ai-Chi Loh et  
21  
22 al's work (35)) to enable a more systematic description of the various aspects of the digital divide  
23  
24 explored by each study (see Box 1).  
25  
26  
27  
28  
29

### 30 *Search strategy*

31  
32  
33 We searched PubMed, Embase, and Google Scholar, alongside hand-searches of bibliographies to  
34  
35 identify relevant manuscripts. In doing so we used a combination of the search terms 'COVID 19' or  
36  
37 'pandemic' or 'COVID' and 'digital health' or 'telemedicine' or 'remote access' or 'digital divide' to  
38  
39 identify studies which had explored the access or utilisation of information or communication  
40  
41 technologies in relation to health and care since the onset of the COVID-19 pandemic.  
42  
43 Bibliographies within the publications we identified were searched alongside a manual search.  
44  
45  
46  
47  
48  
49

### 50 *Inclusion criteria*

51  
52  
53 To be included in our review, the manuscript must consist of original research specific to individuals  
54  
55 using digital technologies in relation to their health or well-being since the beginning of the  
56  
57 pandemic recognised by the WHO as March 2020 with any publication published from the 1<sup>st</sup> of  
58  
59  
60



1  
2  
3 March until the 31<sup>st</sup> of July 2021 (36). This includes the diagnosis, monitoring, or treatment of  
4 COVID-19 and any other condition or disease. The focus of our work was the provision of care  
5 within the developed world ( i.e. one which is predominantly industrialized and more  
6 economically developed with a higher individual income (37) during the early phase of the  
7 pandemic to ensure relevance for policymakers, commissioners and providers in these areas and so  
8 we limited the papers included to those that were available in English.  
9  
10  
11  
12  
13  
14  
15

### 16 17 18 19 20 *Study selection*

21  
22 The process followed the four-stages of PRISMA (34); identification, screening, eligibility and final  
23 inclusion and the search data presented in the PRISMA diagram (see Figure 1). This involved two  
24 reviewers (IL and SG) screening titles, abstracts and where appropriate full texts against the  
25 inclusion criteria and the final selection of papers agreed by both.  
26  
27  
28  
29  
30  
31  
32  
33  
34

### 35 **Figure 1 PRISMA diagram**

### 36 37 38 39 40 *Analysis procedures*

41  
42 We developed a framework that built on the work of Ai-chi Loh et al (35) to reflect a more  
43 nuanced representation of the digital divide describing it within three key domains; Digital Access  
44 relating to the ability to access devices and internet; Digital Literacy describing the skill set of  
45 individuals, and Digital Assimilation addressing the degree to which digital technologies are  
46 incorporated into everyday life. Each domain consists of a series of related constructs and these are  
47 further defined and presented with examples of each in Box 1. A descriptive summary of the  
48 characteristics of each included study was produced (see Table 1) and the findings from the  
49 identified papers are analysed within each of the three domains of our refined framework.  
50  
51  
52  
53  
54  
55  
56  
57  
58  
59  
60

1  
2  
3 **Patient and public involvement**  
4

5  
6 No patients or members of the public were involved in the conceptualisation, design or  
7  
8 undertaking of this rapid review.  
9

10  
11  
12  
13  
14  
15  
16  
17  
18  
19  
20  
21  
22  
23  
24  
25  
26  
27  
28  
29  
30  
31  
32  
33  
34  
35  
36  
37  
38  
39  
40  
41  
42  
43  
44  
45  
46  
47  
48  
49  
50  
51  
52  
53  
54  
55  
56  
57  
58  
59  
60

For peer review only

**Box 1 Framework for interpreting the digital divide in healthcare (after Ai-chi Loh et al (35))**

| <b>Domain</b>               | <b>Definition</b>                                                                                                                       | <b>Construct</b>                                             | <b>Definition</b>                                                                                       | <b>Example</b>                                                                                                           |
|-----------------------------|-----------------------------------------------------------------------------------------------------------------------------------------|--------------------------------------------------------------|---------------------------------------------------------------------------------------------------------|--------------------------------------------------------------------------------------------------------------------------|
| <b>Digital Access</b>       | The ability to access the necessary hardware, software, and internet services associated with utilisation of digital technologies (38). | <i>The types of device available</i>                         | The nature and functionality of the digital device (12).                                                | The model of smartphone or desktop computer and any peripheral or supporting technology such as hard drives or printers. |
|                             |                                                                                                                                         | <i>The ease with which devices can be accessed</i>           | How readily individuals can access digital devices (8, 12).                                             | Relying on the local library for access to a computer.                                                                   |
|                             |                                                                                                                                         | <i>The autonomy and reliability of internet connectivity</i> | The degree of independence with which the internet can be reliably accessed (39, 40).                   | Consistent access to the internet via a user's home internet network.                                                    |
| <b>Digital Literacy</b>     | The degree of sophistication with which individuals are able to use digital technologies (41).                                          | <i>Digital skill set</i>                                     | The confidence and ability of an individual to utilise a variety of digital technologies (42).          | The ability to use and manage email.                                                                                     |
|                             |                                                                                                                                         | <i>Types of digital usage</i>                                | The ways in which digital technologies are utilised (43).                                               | Using search engines to access information on current affairs                                                            |
| <b>Digital Assimilation</b> | The degree to which digital technologies are incorporated and utilised in everyday life (38, 44).                                       | <i>Engagement with digital technologies</i>                  | The degree to which individuals use digital technologies to enhance social connections and values (45). | Establishing a community group on a social media platform to support elderly neighbours.                                 |
|                             |                                                                                                                                         | <i>Social support</i>                                        | Social connections that facilitate an individual's engagement with digital technologies (42).           | The availability of technical support in the use of digital technologies from a son or daughter.                         |
|                             |                                                                                                                                         | <i>Harnessing digital outcomes</i>                           | The ability to contextualise the use of digital technologies to achieve quantifiable outputs (46, 47).  | Using software apps to reach and maintain fitness goals.                                                                 |

## Results

A total of 28 candidate articles were identified from a search of the named databases and hand-searches from the bibliographies of these references. Ultimately nine papers were selected for the analysis, the remaining papers were excluded as they were either opinion pieces that did not contain original research or despite being published after March 2020 referenced research conducted prior to the onset of the epidemic. One study looked at Digital Access; set in UK primary care it explored internet connectivity amongst vulnerable patients (including those that have received an organ transplant, are undertaking immunotherapy or an intense course of radiotherapy for lung cancer) (48, 49). It was also one of the seven studies that looked at Digital Literacy (49) alongside five studies set in the United States that explored the use of digital technologies in accessing care amongst different ethnic groups (50-54) and one study conducted in Italy that looked at the age and gender of patients using telemedicine (55). Two studies were concerned with Digital Assimilation, one set in Italy described the social support gained from using video messaging platforms (56) and a second again set in the United States explored the characteristics of individuals posting COVID-related content on social media (57). The key characteristics of these papers are summarised in Table 1.

**Table 1 Summary of study characteristics**

| <b>Authors</b>                             | <b>Study design</b> | <b>Country</b> | <b>Study Population</b>            | <b>Research question</b>                                                                                        | <b>Analytical framework</b>                    | <b>Findings</b>                                                                                                                                                                                                                                                |
|--------------------------------------------|---------------------|----------------|------------------------------------|-----------------------------------------------------------------------------------------------------------------|------------------------------------------------|----------------------------------------------------------------------------------------------------------------------------------------------------------------------------------------------------------------------------------------------------------------|
| Campos-Castillo & Anthony (2020) (54)      | Cohort Study        | USA            | 10 624 USA-wide survey respondents | What are the characteristics of patients that used ICTs to connect with care providers in relation to COVID-19. | Logistic regression                            | Total of 17% of respondents self-reported using telehealth because of the pandemic. Black respondents were more likely than Whites to report using telehealth because of the pandemic (OR, 1.42; 95% CI, 1.07–1.88).                                           |
| Campos-Castillo C & Laestadius (2020) (57) | Cohort study        | USA            | 10,541 USA-wide survey respondents | What are the characteristics of patients posting COVID-19 related messages on social media                      | Logistic regression                            | Respondents who identified as black (OR 1.29, 95% CI 1.02-1.64; <i>P</i> =.03), or Latino (OR 1.66, 95% CI 1.36-2.04; <i>PP</i> =.03) had higher odds than respondents who identified as white of reporting that they posted COVID-19 content on social media. |
| Chunara R, et al (2020) (50)               | Cohort study        | USA            | 140,184 patients                   | What are the characteristics of patients that use telemedicine                                                  | Descriptive statistics and logistic regression | Black patients nearly half as likely as white patients to access care through telemedicine (OR 0.6 times (95% CI: 0.58–0.63)                                                                                                                                   |
| Eberly, et al. (2020) (53)                 | Cohort study        | USA            | 2,940 cardiovascular outpatients   | What are the characteristics of patients that complete a telemedicine consultation                              | Logistic regression                            | Being female and being non-English speaking were independently associated with less telemedicine use.                                                                                                                                                          |
| Gabbiadini et al 2020 (56)                 | Cross-sectional     | Italy          | 465 respondents                    | Whether the use ICT promoted perceptions of social support (mitigating the psychological effects of lockdown)   | Separate multiple and simple regression models | The amount of technology use was a significant predictor of perceived social support. (OR 2.40, <i>p</i> < 0.02, 99% CI –0.01, 0.31).                                                                                                                          |

|                           |                 |       |                                                                                                    |                                                                                                                                                      |                                                                                                                           |                                                                                                                                                                                                                                                                                                                           |
|---------------------------|-----------------|-------|----------------------------------------------------------------------------------------------------|------------------------------------------------------------------------------------------------------------------------------------------------------|---------------------------------------------------------------------------------------------------------------------------|---------------------------------------------------------------------------------------------------------------------------------------------------------------------------------------------------------------------------------------------------------------------------------------------------------------------------|
| Hughes et al (2020) (49)  | Mixed methods   | UK    | 156 high-risk individuals and a further 1,217 vulnerable patients over the age of 70               | Can medical students (general practitioner trainees) use tele-consultations to assess the needs of patients and support digital access to healthcare | Descriptive statistical analysis. Thematic analysis of conversations issues arising, no theoretical framework named       | A total of 22% high risk patients and 44% of vulnerable patients reported connectivity issues. Participants reported that were confident in ordering medication online.                                                                                                                                                   |
| Runfola et al (2020) (55) | Cohort study    | Italy | 33 Bariatric outpatients                                                                           | What are the characteristics of patients that completed a telemedicine consultation                                                                  | Categorical data was compared using the chi-square test. Continuous variables compared using the Student's <i>t</i> test. | 57.6% (19) completed the consultation. No significant differences were found between participants and non-participants in terms of age and gender.                                                                                                                                                                        |
| Weber et al (2020) (51)   | Cohort study    | USA   | 52,585 patients diagnosed with COVID-19                                                            | What are the characteristics of patients that access care by tele-medicine, ER or office visit                                                       | Descriptive statistics and multinomial regression analysis                                                                | White patients had the highest predicted probabilities of using telehealth (46.7%) Black and Hispanic patients over 65 have lowest predicted probability (11.3%)                                                                                                                                                          |
| Whaley et al (2020) (52)  | Cross-sectional | USA   | Data from 5.6 to 6.8 million US individuals with employer health insurance between 2018, and 2020, | What are the characteristics of patients that use telemedicine.                                                                                      | Logistic regression                                                                                                       | Patients living in post codes with lower-income or majority racial/ethnic minority populations had lower rates of adoption of telemedicine; $\geq 80\%$ racial/ethnic minority post code: -71.6 per 10 000 (95% CI, -87.6 to -55.5); 79%-21% racial/ethnic minority post code: -15.1 per 10 000 (95% CI, -19.8 to -10.4). |

### Digital Access

We identified one study concerned with the access of digital technologies, specifically the reliability of internet connectivity. It was conducted in United Kingdom (UK) primary care as part of a study whose overall aim was to explore whether vulnerable patients might be usefully supported by tele-coaching in the use of digital health technologies, in this instance by General Practitioner (GP) trainees (49). As part of these conversations a direct question was asked around internet connectivity and the authors reported that 22% of high- risk patients and 44% of vulnerable patients reported issues (49).

### Digital Literacy

A total of seven studies addressed the domain of Digital Literacy and in particular an individual's digital skill set, specifically in relation to the ways in which they accessed care. All provided comparisons of use between groups using descriptions of demographic characteristics that included age, gender and ethnicity (58). Two studies used routinely collected electronic health data, though were conducted independently of each other at two different sites in New York (United States) (50, 51). The first used data gathered from patients at New York University Hospital collected over a 6-week period to determine whether they had received their COVID-19 diagnosis at an office visit or via video consultation. The authors described that the digital infrastructure of the service was well resourced and established and therefore attributed the reduced utilization of telemedicine by black patients to factors unrelated to the digital capacity of the facility (50). The second study set in New York was also situated within a large health care centre and again compared the means of accessing healthcare between ethnic groups within the early months of the pandemic (51). They found that black and Hispanic patients were more likely to visit the Emergency Room or arrange an office visit than use telehealth than their white or Asian counterparts (51). In

1  
2  
3 this instance the authors recognised that the more extensive use of ER may be due to the  
4  
5 disproportionate number of ethnic minorities that experienced severe COVID-related symptoms  
6  
7 (51). Another study set in the United States compared the use of telemedicine amongst  
8  
9 commercially insured patients from 2018 through to 2020 (52). In doing so they explored  
10  
11 differences in both the nature of the care they received and the means of access in the first two  
12  
13 months of the pandemic and described that though there was an increase in telemedicine it did not  
14  
15 make up the shortfall in the number of visits in comparison to the usual levels of assessing  
16  
17 preventative or elective care amongst ethnic minorities (52). Campos-Castilo and Anthony  
18  
19 conducted a secondary analysis of a national survey a secondary analysis of cross-sectional survey  
20  
21 data from the Pew Research Center's American Trends Panel, which is a national, probability-based  
22  
23 online panel of adults (18 or older) living in US households exploring self-reported use of  
24  
25 telemedicine and following adjustment for socio-economic status (SES), age and perceived level of  
26  
27 threat to their health from the pandemic (no threat, minor, or major) (54). They found black  
28  
29 patients were actually more likely to contact care providers using ICTs if they perceived their health  
30  
31 was threatened by the virus (54).  
32  
33  
34  
35  
36  
37  
38  
39  
40

41 Two studies specifically explored whether there were differences in the characteristics of patients  
42  
43 fulfilling pre-arranged or routine video-consultations during the pandemic. One of these studies  
44  
45 was also set in the USA and compared the characteristics of cardiovascular patients that 'attended'  
46  
47 teleconsultations and found no differences in cancellation rates based on race, ethnicity, or  
48  
49 household income. However, differences between genders were observed with those completing  
50  
51 telemedicine tending to be male and older (53). In Italy Runfola et al explored the utilisation and  
52  
53 subsequent satisfaction with video consultations amongst a group of bariatric patients. They found  
54  
55 no significant differences in terms age or gender between those that succeeded or failed to  
56  
57 complete a video call (55). However, in terms of overall numbers just under 58% of patients  
58  
59  
60



1  
2  
3 fulfilled the video-consultation and the authors felt that this was due to the absence of basic  
4  
5 computer skills and a lack of self-efficacy in utilising video-call systems (55). In relation to self-  
6  
7 efficacy the Hughes study set in the UK also assessed vulnerable patients' confidence and ability to  
8  
9 order medications online and reported they were comfortable and confident with the process (49).  
10  
11  
12  
13  
14  
15

### 16 **Digital Assimilation**

17  
18  
19 Two studies explored the use of digital technologies in relation to maintaining or interacting with a  
20  
21 social network. One study set in Italy described how feelings of loneliness, boredom and irritability  
22  
23 were all reduced as a result of regular utilisation of video calls, and the positive effects on  
24  
25 maintaining meaningful relationships and mental health (56). Meanwhile in the United States  
26  
27 another secondary analysis of the same cross-sectional survey data from the Pew Research  
28  
29 Center's American Trends Panel, was conducted to understand if there were differences in the  
30  
31 characteristics of individuals that posted COVID-19 related content to social media platforms (57).  
32  
33  
34 The authors discovered that proportionally members of racial and ethnic minority groups and  
35  
36 amongst these older black males, were the most likely to contribute COVID-19 related content (57).  
37  
38  
39  
40  
41  
42  
43  
44  
45  
46  
47  
48  
49  
50  
51  
52  
53  
54  
55  
56  
57  
58  
59  
60

## Discussion

### *General findings*

Our rapid review identified how pre-existing societal disparities in access to and utilisation of health-related digital technologies were accentuated by COVID-19. We identified nine studies that explored various constructs within the three domains of our digital divide framework. In relation to Digital Access, poor internet access amongst the elderly was reported (49), as regards Digital Literacy lower levels of take-up of telemedicine amongst certain communities in the United States were described particularly among black and Hispanic patients (51-54). Within the domain of Digital Assimilation one study described how face-time technology can sustain relationships amongst dislocated peer groups (55), and another how black and elderly males, previously considered a group unprepared to share health information on social media platforms were the demographic most likely to post content on the pandemic, an important consideration in understanding the emerging scepticism of the COVID vaccine in ethnic groups (56).

### **Strengths and weaknesses**

Our search strategy was designed to capture the experiences and broader lessons that might be learnt by exploring the initial stages of the pandemic, including those of countries that had health services of sufficient maturity to initiate agile and integrated responses. We focussed on the early phase of the pandemic in order to understand the impact of the rapid changes to service delivery on those most vulnerable to the digital divide with the intention of producing timely findings that might inform service delivery in subsequent phases. That our search uncovered so few studies can be attributed to two factors relating to the pandemic; first that the research capacity of healthcare organisations would have been compromised by dealing with the exceptional demand on their services (59, 60); second that the issue of the 'digital divide' which had previously failed to be

1  
2  
3 considered a priority was unlikely to be addressed during the most serious public health crisis in a  
4  
5 generation (61).  
6  
7  
8  
9

10  
11 Although our search initially uncovered numerous titles many were opinion or editorial pieces,  
12  
13 demonstrating how widely recognised the phenomenon of the digital divide is but also its lack of  
14  
15 priority as a subject for original research (24, 28, 62-64). The studies identified were conducted  
16  
17 within only three countries at the time of the first wave they constituted three of the top four  
18  
19 worst death rates from COVID-19 *per capita* (65, 66).  
20  
21  
22  
23  
24  
25

26  
27 Our rapid review discovered only a small number of heterogeneous papers of limited geographic  
28  
29 scope which precluded data synthesis and may have introduced a degree of bias. The lack of a  
30  
31 theoretical underpinning in many of the papers limited generalisability (66) and that two of the  
32  
33 studies relied on self-reported data (49, 54) raises familiar issues regards their reliability (67).  
34  
35 However previous comparisons between systematic and rapid reviews have failed to find  
36  
37 significant differences in the outcomes they report (68, 69) and all of our included studies offered  
38  
39 valuable insight into how the digital divide was magnified by the changes to health delivery in the  
40  
41 early stages of the pandemic.  
42  
43  
44  
45  
46  
47

#### 48 *Specific findings*

#### 49 50 51 **Digital Access**

52  
53  
54 The Hughes paper provides the latest example of how discrepancies in reliable internet  
55  
56 connectivity continue in England (49, 70) findings which were corroborated by the most recent  
57  
58 surveys of digital access conducted in the UK which found that nearly 7% of homes in England and  
59  
60

1  
2  
3 Wales did not have a reliable internet connection (71, 72), a lack of connectivity that  
4  
5 disproportionately affected the elderly, those of lower socio-economic status, and the disabled (71-  
6  
7 74).  
8  
9

10  
11  
12  
13  
14 Despite the calls to harness digital technologies on a global scale (5, 75-77), these also need to  
15  
16 address the stubborn differences in digital access that remain within the developed world where  
17  
18 significant divisions in digital connectivity and utility remain and continue to affect the most  
19  
20 vulnerable members of society (8, 75, 78-86). The pandemic prompted broader acknowledgement  
21  
22 of these differences in several health economies where a number of initiatives were introduced  
23  
24 (64, 87). For example in the UK broadband providers lowered prices and reduced data caps for the  
25  
26 vulnerable (88), and in the United States roving buses were used to provide Wi-Fi access for  
27  
28 unconnected communities (89).  
29  
30  
31  
32  
33  
34

### 35 **Digital Literacy**

36  
37  
38 The patterns in digital literacy relating to socio-economic status, age, or race described in four of  
39  
40 the studies we identified (50, 51, 53, 54) have been observed for nearly three decades (8, 18-20,  
41  
42 73, 74, 90-92). However, prior to the pandemic, using traditional methods of in-person access did  
43  
44 not hold the same degree of risk as during a pandemic where airborne transmission led to  
45  
46 widespread recommendations to minimise social contact(36). This may be due in part to variations  
47  
48 in individual perception of risk influenced by personal experience, social values, and the attitudes  
49  
50 of friends and family (93). It also reflects the resistance of the digital divide to intervention. A  
51  
52 number of previous attempts have been made to connect less technologically enabled patients to  
53  
54 the appropriate care (63, 94, 95). However, the non-adoption and abandonment of telehealth  
55  
56 technologies by the intended users is common (96-99) complicated by the influences of the  
57  
58  
59  
60

1  
2  
3 provider organisation and the design and compatibility of the intervention (100). Self-efficacy,  
4  
5 patient activation and motivation are also critical yet underexplored components of the uptake of  
6  
7 digital technology (101) as are the impact of patients' knowledge of their condition; the  
8  
9 expectations of the care they should receive, their social situation and the resources at their  
10  
11 disposal (102).  
12  
13  
14  
15  
16  
17

18 In attempting to unpick this complexity a number of theoretical frameworks have been developed  
19  
20 intended to support adoption and produce transferable learning for a range of digital innovations  
21  
22 (103). There have also been calls for greater patient and public involvement in designing and  
23  
24 developing digital healthcare to ensure the needs and preferences of the full range of patients are  
25  
26 incorporated (104, 105).  
27  
28  
29  
30  
31  
32

### 33 ***Digital Assimilation***

34  
35  
36 For over a decade the internet has been recognised as a key source of health information for the  
37  
38 public and patients, yet the precise role of social media in the communication of health-related  
39  
40 information is less clear (106). Although limited, evidence tended to suggest that sharing health  
41  
42 information online was favoured by the young (107) and was less so amongst the elderly or those  
43  
44 of lower socio-economic status (SES) (108). However, one study we found described how older  
45  
46 black males were more likely to share information about COVID-19 through social media channels  
47  
48 than other demographic groups (57). This may in part be due to the growing reluctance amongst  
49  
50 black and ethnic minority groups to trust information provided by healthcare professionals or the  
51  
52 mainstream media (109-111). That highlights how the growing consumption of health information  
53  
54 through a largely unregulated network of social media platforms can have serious repercussions for  
55  
56  
57  
58  
59  
60

1  
2  
3 public health (111-115). This is of particular concern when placed in the context of the growing  
4  
5 scepticism about the COVID-19 vaccine in minority communities (116, 117).  
6  
7  
8  
9

10  
11 Despite the potential for spreading misinformation the work by Runfola observed benefits for  
12  
13 mental health from the use of face-to-face digital contact during the pandemic (55) and related  
14  
15 work found benefits from the introduction of an online blog tailored for psychiatric patients (118).  
16  
17 The last five years has seen a growing realisation that the responsible use of social media can be an  
18  
19 effective means of alleviating depression and social isolation and improve mental well-being (119-  
20  
21 121). In particular the utilisation of face-time technologies has been shown to increase and  
22  
23 enhance social interactions (122) and engagement (123). During the pandemic these benefits were  
24  
25 recognised by the UK government in their scheme that provided free tablets to care homes to help  
26  
27 connect isolating residents with their families and loved ones (124).  
28  
29  
30  
31  
32  
33  
34  
35

### 36 **Conclusions**

37  
38 The rapid incorporation of digital technologies into mainstream health care delivery due to the  
39  
40 COVID pandemic was widely understood and accepted by patients in the developed world  
41  
42 unwilling to breach social distancing advice. However, not all patient groups were either willing or  
43  
44 able to utilise the digital services made available nor maximise the reported benefits of face-time  
45  
46 technology to alleviate the effects of isolation. Our findings provide further evidence that patient  
47  
48 engagement with any model of digital healthcare is vulnerable to complex socio-political factors. If  
49  
50 more are to reap the potential benefits of digital healthcare then not only are acknowledged  
51  
52 improvements in infrastructure needed but also concerted efforts to train, equip and motivate all  
53  
54 patients in its use.  
55  
56  
57  
58  
59  
60

### **Ethics statement**

Ethical approval was not required

### **Data Sharing Statement**

No additional data is available for sharing.

### **Funding**

The work was not externally funded

### **Conflicts of interest**

There are no conflicts of interest

### **Author's contribution**

IL was responsible for the conception of the work and the design of the review. IL and SG reviewed the articles and IL led the drafting of the article with input from SG and DS. SG and DS all provided critical revisions. The final version was drafted by IL and approved by SG and DS.

### **Statement**

I, the Submitting Author has the right to grant and does grant on behalf of all authors of the Work (as defined in the below author licence), an exclusive licence and/or a non-exclusive licence for contributions from authors who are: i) UK Crown employees; ii) where BMJ has agreed a CC-BY licence shall apply, and/or iii) in accordance with the terms applicable for US Federal Government officers or employees acting as part of their official duties; on a worldwide, perpetual, irrevocable, royalty-free basis to BMJ Publishing Group Ltd ("BMJ") its licensees and where the relevant Journal is co-owned by BMJ to the co-owners of the Journal, to publish the Work in BMJ Quality & Safety and any other BMJ products and to exploit all rights, as set out in our licence.

1  
2  
3  
4  
5 The Submitting Author accepts and understands that any supply made under these terms is  
6 made by BMJ to the Submitting Author unless you are acting as an employee on behalf of your  
7 employer or a postgraduate student of an affiliated institution which is paying any applicable  
8 article publishing charge (“APC”) for Open Access articles. Where the Submitting Author  
9 wishes to make the Work available on an Open Access basis (and intends to pay the relevant  
10 APC), the terms of reuse of such Open Access shall be governed by a Creative Commons  
11 licence – details of these licences and which Creative Commons licence will apply to this Work  
12 are set out in our licence referred to above.  
13  
14  
15  
16  
17  
18  
19  
20  
21  
22  
23  
24  
25  
26  
27  
28  
29  
30  
31  
32  
33  
34  
35  
36  
37  
38  
39  
40  
41  
42  
43  
44  
45  
46  
47  
48  
49  
50  
51  
52  
53  
54  
55  
56  
57  
58  
59  
60



## Reference List

1. Bhavnani SP, Narula J, Sengupta PP. Mobile technology and the digitization of healthcare. *Eur Heart J*. 2016;37(18):1428-38.
2. Pagliari C, Detmer D, Singleton P. Potential of electronic personal health records. *BMJ*. 2007;335(7615):330.
3. Maisonneuve Cdl, Martins JO. The future of health and long-term care spending. 2014.
4. Rimmer A. Technology will improve doctors' relationships with patients, says Topol review. *BMJ*. 2019;364:l661.
5. World Health Organisation. Digital Health 2020 [Available from: [https://www.who.int/health-topics/digital-health#tab=tab\\_2](https://www.who.int/health-topics/digital-health#tab=tab_2)].
6. Reeves JJ, Ayers JW, Longhurst CA. Telehealth in the COVID-19 Era: A Balancing Act to Avoid Harm. *Journal of medical Internet research*. 2021;23(2):e24785-e.
7. Powell RE, Henstenburg JM, Cooper G, Hollander JE, Rising KL. Patient Perceptions of Telehealth Primary Care Video Visits. *Annals of family medicine*. 2017;15(3):225-9.
8. van Deursen AJAM, van Dijk JAGM. The first-level digital divide shifts from inequalities in physical access to inequalities in material access. *New Media & Society*. 2018;21(2):354-75.
9. Bhaskar S, Bradley S, Chattu VK, Adisesh A, Nurtazina A, Kyrykbayeva S, et al. Telemedicine Across the Globe-Position Paper From the COVID-19 Pandemic Health System Resilience PROGRAM (REPROGRAM) International Consortium (Part 1). *Frontiers in public health*. 2020;8:556720-.
10. Bhaskar S, Bradley S, Chattu VK, Adisesh A, Nurtazina A, Kyrykbayeva S, et al. Telemedicine as the New Outpatient Clinic Gone Digital: Position Paper From the Pandemic Health System REsilience PROGRAM (REPROGRAM) International Consortium (Part 2). *Front Public Health*. 2020;8:410.
11. Perrin A. Digital gap between rural and nonrural America persists. The Pew Research Centre; 2019.
12. Selwyn N. Reconsidering Political and Popular Understandings of the Digital Divide. *New Media & Society*. 2004;6(3):341-62.
13. Cullen R. The digital divide: a global and national call to action. *The Electronic Library*. 2003;21(3):247-57.
14. Scott Kruse C, Karem P, Shifflett K, Vegi L, Ravi K, Brooks M. Evaluating barriers to adopting telemedicine worldwide: A systematic review. *Journal of Telemedicine and Telecare*. 2016;24(1):4-12.
15. Fox NJ. Health sociology from post-structuralism to the new materialisms. *Health*. 2015;20(1):62-74.
16. van Dijk JAGM. Digital divide research, achievements and shortcomings. *Poetics*. 2006;34(4):221-35.
17. Lai J, Widmar NO. Revisiting the Digital Divide in the COVID-19 Era. *Applied Economic Perspectives and Policy*. 2020;n/a(n/a).
18. Evans C. The coronavirus crisis and the technology sector. *Business Economics*. 2020;55(4):253-66.
19. Thornton J. Covid-19: how coronavirus will change the face of general practice forever. *BMJ*. 2020;368:m1279.
20. Webster P. Virtual health care in the era of COVID-19. *Lancet*. 2020;395(10231):1180-1.
21. de Wet C, Bowie P, O'Donnell C. 'The big buzz': a qualitative study of how safe care is perceived, understood and improved in general practice. *BMC Family Practice*. 2018;19(1):83.
22. Kaufman G, McCaughan D. The effect of organisational culture on patient safety. *Nursing standard (Royal College of Nursing (Great Britain) : 1987)*. 2013;27(43):50-6.
23. The Good Things Foundation. Digital Inclusion in Health and Care: Lessons learned from the NHS Widening Digital Participation Programme (2017-2020). 2020.
24. Watts G. COVID-19 and the digital divide in the UK. *Lancet Digit Health*. 2020;2(8):e395-e6.

- 1
  - 2
  - 3
  - 4
  - 5
  - 6
  - 7
  - 8
  - 9
  - 10
  - 11
  - 12
  - 13
  - 14
  - 15
  - 16
  - 17
  - 18
  - 19
  - 20
  - 21
  - 22
  - 23
  - 24
  - 25
  - 26
  - 27
  - 28
  - 29
  - 30
  - 31
  - 32
  - 33
  - 34
  - 35
  - 36
  - 37
  - 38
  - 39
  - 40
  - 41
  - 42
  - 43
  - 44
  - 45
  - 46
  - 47
  - 48
  - 49
  - 50
  - 51
  - 52
  - 53
  - 54
  - 55
  - 56
  - 57
  - 58
  - 59
  - 60
25. Ramsetty A, Adams C. Impact of the digital divide in the age of COVID-19. *Journal of the American Medical Informatics Association*. 2020;27(7):1147-8.
26. De R, Pandey N, Pal A. Impact of digital surge during Covid-19 pandemic: A viewpoint on research and practice. *Int J Inf Manage*. 2020;55:102171-.
27. Scanzera AC, Kim SJ, Paul Chan RV. Teleophthalmology and the digital divide: inequities highlighted by the COVID-19 pandemic. *Eye*. 2020.
28. Lee JGL, LePrevost CE, Harwell EL, Bloss JE, Cofie LE, Wiggins MF, et al. Coronavirus pandemic highlights critical gaps in rural Internet access for migrant and seasonal farmworkers: a call for partnership with medical libraries. *J Med Libr Assoc*. 2020;108(4):651-5.
29. Martins Van Jaarsveld G. The Effects of COVID-19 Among the Elderly Population: A Case for Closing the Digital Divide. *Frontiers in Psychiatry*. 2020;11(1211).
30. Seifert A, Batsis JA, Smith AC. Telemedicine in Long-Term Care Facilities During and Beyond COVID-19: Challenges Caused by the Digital Divide. *Frontiers in Public Health*. 2020;8(690).
31. Visram S, Hussain W, Goddard A. Towards future healthcare that is digital by default. *Future Healthc J*. 2020;7(3):180.
32. Oliver K, Innvar S, Lorenc T, Woodman J, Thomas J. A systematic review of barriers to and facilitators of the use of evidence by policymakers. *BMC health services research*. 2014;14(1):1-12.
33. Langlois EV, Straus SE, Antony J, King VJ, Tricco AC. Using rapid reviews to strengthen health policy and systems and progress towards universal health coverage. *BMJ Global Health*. 2019;4(1):e001178.
34. Moher D, Shamseer L, Clarke M, Ghersi D, Liberati A, Petticrew M, et al. Preferred reporting items for systematic review and meta-analysis protocols (PRISMA-P) 2015 statement. *Syst Rev*. 2015;4(1):1-.
35. Ai-chi Loh Y CA. Reconsidering the Digital Divide: An analytical framework from access to appropriation. the 69th Annual International Communication Association (ICA) Conference;; Washington DC2019.
36. World Health Organisation. WHO announces COVID-19 outbreak a pandemic: World Health Organisation; 2020 [Available from: <https://www.euro.who.int/en/health-topics/health-emergencies/coronavirus-covid-19/news/news/2020/3/who-announces-covid-19-outbreak-a-pandemic>].
37. Paprotny D. Convergence between Developed and Developing countries: A centennial perspective. *Social indicators research*. 2021;153(1):193-225.
38. Wei K-K, Teo H-H, Chan HC, Tan BCY. Conceptualizing and Testing a Social Cognitive Model of the Digital Divide. *Information Systems Research*. 2010;22(1):170-87.
39. Lim SS. Home, School, Borrowed, Public or Mobile: Variations in Young Singaporeans' Internet Access and Their Implications. *Journal of Computer-Mediated Communication*. 2009;14(4):1228-56.
40. Brandtzæg PB. Towards a unified Media-User Typology (MUT): A meta-analysis and review of the research literature on media-user typologies. *Computers in Human Behavior*. 2010;26(5):940-56.
41. Hargittai E, Piper AM, Morris MR. From internet access to internet skills: digital inequality among older adults. *Universal Access in the Information Society*. 2019;18(4):881-90.
42. DiMaggio P, Hargittai E, Neuman WR, Robinson JP. Social Implications of the Internet. *Annual Review of Sociology*. 2001;27(1):307-36.
43. Fernández-de-Álava M, Quesada-Pallarès C, García-Carmona M. Use of ICTs at work: an intergenerational analysis in Spain / Uso de las TIC en el puesto de trabajo: un análisis intergeneracional en España. *Culture and Education*. 2017;29(1):120-50.
44. Kirk CP, Swain SD, Gaskin JE. I'm Proud of It: Consumer Technology Appropriation and Psychological Ownership. *Journal of Marketing Theory and Practice*. 2015;23(2):166-84.

- 1
- 2
- 3
- 4 45. Stewart J. The social consumption of information and communication technologies (ICTs):
- 5 insights from research on the appropriation and consumption of new ICTs in the domestic
- 6 environment. *Cognition, Technology & Work*. 2003;5:4-14.
- 7 46. Selwyn N, Gorard S, Furlong J. Whose Internet is it Anyway?: Exploring Adults' (Non)Use of
- 8 the Internet in Everyday Life. *European Journal of Communication*. 2005;20(1):5-26.
- 9 47. Haugerud T. Student Teachers Learning to Teach: The Mastery and Appropriation of Digital
- 10 Technology. *Nordic Journal of Digital Literacy*. 2011;6(4):226-38.
- 11 48. NHSE. Who is at high risk from coronavirus (clinically extremely vulnerable) 2020 [Available
- 12 from: [https://www.nhs.uk/conditions/coronavirus-covid-19/people-at-higher-risk/who-is-at-high-](https://www.nhs.uk/conditions/coronavirus-covid-19/people-at-higher-risk/who-is-at-high-risk-from-coronavirus-clinically-extremely-vulnerable/)
- 13 [risk-from-coronavirus-clinically-extremely-vulnerable/](https://www.nhs.uk/conditions/coronavirus-covid-19/people-at-higher-risk/who-is-at-high-risk-from-coronavirus-clinically-extremely-vulnerable/).
- 14 49. Hughes T, Beard E, Bowman A, Chan J, Gadsby K, Hughes M, et al. Medical student support
- 15 for vulnerable patients during COVID-19 - a convergent mixed-methods study. *BMC Med Educ*.
- 16 2020;20(1):377.
- 17 50. Chunara R, Zhao Y, Chen J, Lawrence K, Testa PA, Nov O, et al. Telemedicine and healthcare
- 18 disparities: a cohort study in a large healthcare system in New York City during COVID-19. *Journal*
- 19 *of the American Medical Informatics Association*. 2020.
- 20 51. Weber E, Miller SJ, Astha V, Janevic T, Benn E. Characteristics of Telehealth Users in NYC for
- 21 COVID-related Care during the Coronavirus Pandemic. *J Am Med Inform Assoc*. 2020.
- 22 52. Whaley CM, Pera MF, Cantor J, Chang J, Velasco J, Hagg HK, et al. Changes in Health
- 23 Services Use Among Commercially Insured US Populations During the COVID-19 Pandemic. *JAMA*
- 24 *Netw Open*. 2020;3(11):e2024984.
- 25 53. Eberly LA, Khatana SAM, Nathan AS, Snider C, Julien HM, Deleener ME, et al. Telemedicine
- 26 Outpatient Cardiovascular Care During the COVID-19 Pandemic: Bridging or Opening the Digital
- 27 Divide? *Circulation*. 2020;142(5):510-2.
- 28 54. Campos-Castillo C, Anthony D. Racial and ethnic differences in self-reported telehealth use
- 29 during the COVID-19 pandemic: a secondary analysis of a US survey of internet users from late
- 30 March. *Journal of the American Medical Informatics Association*. 2020.
- 31 55. Runfola M, Fantola G, Pintus S, Iafrancesco M, Moroni R. Telemedicine Implementation on a
- 32 Bariatric Outpatient Clinic During COVID-19 Pandemic in Italy: an Unexpected Hill-Start. *Obes*
- 33 *Surg*. 2020;30(12):5145-9.
- 34 56. Gabbiadini A, Baldissarri C, Durante F, Valtorta RR, De Rosa M, Gallucci M. Together Apart:
- 35 The Mitigating Role of Digital Communication Technologies on Negative Affect During the COVID-
- 36 19 Outbreak in Italy. *Front Psychol*. 2020;11:554678.
- 37 57. Campos-Castillo C, Laestadius LI. Racial and Ethnic Digital Divides in Posting COVID-19
- 38 Content on Social Media Among US Adults: Secondary Survey Analysis. *J Med Internet Res*.
- 39 2020;22(7):e20472.
- 40 58. Lal Dey B, Binsardi B, Prendergast R, Saren M. A qualitative enquiry into the appropriation
- 41 of mobile telephony at the bottom of the pyramid. *International Marketing Review*.
- 42 2013;30(4):297-322.
- 43 59. England N. Standard operating procedure for for general practice in the context of
- 44 coronavirus (COVID-19) 2020 [Available from:
- 45 [https://www.england.nhs.uk/coronavirus/publication/managing-coronavirus-covid-19-in-general-](https://www.england.nhs.uk/coronavirus/publication/managing-coronavirus-covid-19-in-general-practice-sop/)
- 46 [practice-sop/](https://www.england.nhs.uk/coronavirus/publication/managing-coronavirus-covid-19-in-general-practice-sop/).
- 47 60. Facher L. 9 ways Covid-19 may forever upend the U.S. health care industry 2020 [Available
- 48 from: <https://www.statnews.com/2020/05/19/9-ways-covid-19-forever-upend-health-care/>.
- 49 61. D2N2. New European Social Fund call to help address the digital divide. 2020.
- 50 62. Allman K. 2020. [cited 2020].
- 51 63. Majid A. 2020. Available from: [https://blogs.bmj.com/bmj/2020/09/01/covid-19-is-](https://blogs.bmj.com/bmj/2020/09/01/covid-19-is-magnifying-the-digital-divide/)
- 52 [magnifying-the-digital-divide/](https://blogs.bmj.com/bmj/2020/09/01/covid-19-is-magnifying-the-digital-divide/).
- 53 64. Stanford University. Digital Divide 2020 [Available from:
- 54 <https://cs.stanford.edu/people/eroberts/cs181/projects/digital-divide/start.html>.
- 55
- 56
- 57
- 58
- 59
- 60

- 1  
2  
3  
4  
5  
6  
7  
8  
9  
10  
11  
12  
13  
14  
15  
16  
17  
18  
19  
20  
21  
22  
23  
24  
25  
26  
27  
28  
29  
30  
31  
32  
33  
34  
35  
36  
37  
38  
39  
40  
41  
42  
43  
44  
45  
46  
47  
48  
49  
50  
51  
52  
53  
54  
55  
56  
57  
58  
59  
60
65. Medicine JHUo. Mortality Analyses. 2021.
  66. Davidoff F, Dixon-Woods M, Leviton L, Michie S. Demystifying theory and its use in improvement. *BMJ Quality & Safety*. 2015;24(3):228.
  67. Jerolmack C, Khan S. Talk Is Cheap: Ethnography and the Attitudinal Fallacy. *Sociological Methods & Research*. 2014;43(2):178-209.
  68. Tricco AC, Antony J, Zarin W, Striffler L, Ghassemi M, Ivory J, et al. A scoping review of rapid review methods. *BMC Medicine*. 2015;13(1):224.
  69. Abou-Setta AM, Jeyaraman M, Attia A, Al-Inany HG, Ferri M, Ansari MT, et al. Methods for Developing Evidence Reviews in Short Periods of Time: A Scoping Review. *PloS one*. 2016;11(12):e0165903-e.
  70. Clarke CS, Round J, Morris S, Kharicha K, Ford J, Manthorpe J, et al. Exploring the relationship between frequent internet use and health and social care resource use in a community-based cohort of older adults: an observational study in primary care. *BMJ open*. 2017;7(7):e015839.
  71. Sweney M. Slow digital services are marginalising rural areas, MPs warn. *The Guardian*. 2019.
  72. Oxford Internet Institute. Oxford Internet Surveys 2020 [Available from: <https://oxis.oii.ox.ac.uk/>].
  73. Lloyds Bank. Lloyds Bank UK Consumer Digital Index 2020 2020 [Available from: <https://www.lloydsbank.com/banking-with-us/whats-happening/consumer-digital-index.html>].
  74. Office of National Statistics. Internet access – households and individuals, Great Britain: 2018 2019 [cited 2020 December]. Available from: <https://www.ons.gov.uk/peoplepopulationandcommunity/householdcharacteristics/homeinternetandsocialmediausage/bulletins/internetaccesshouseholdsandindividuals/2018>.
  75. James J. The global digital divide in the Internet: developed countries constructs and Third World realities. *Journal of Information Science*. 2005;31(2):114-23.
  76. Bhaskar S, Rastogi A, Menon KV, Kunheri B, Balakrishnan S, Howick J. Call for Action to Address Equity and Justice Divide During COVID-19. *Front Psychiatry*. 2020;11:559905.
  77. Giansanti D, Veltro G. The Digital Divide in the Era of COVID-19: An Investigation into an Important Obstacle to the Access to the mHealth by the Citizen. *Healthcare (Basel)*. 2021;9(4).
  78. Kulkarni M. Digital accessibility: Challenges and opportunities. *IIMB Management Review*. 2019;31(1):91-8.
  79. Rich MJ, Pather S. A response to the persistent digital divide: Critical components of a community network ecosystem. *Information Development*. 2020:0266666920924696.
  80. BBC. 2020 [Available from: <https://www.bbc.co.uk/news/education-52399589>].
  81. Helsper E, Galacz A. Understanding the links between social and digital inclusion in Europe. *The World Wide Internet: Changing Societies, Economies and Cultures*. 2009:146-78.
  82. Vasilescu MD, Serban AC, Dimian GC, Aceleanu MI, Picatoste X. Digital divide, skills and perceptions on digitalisation in the European Union-Towards a smart labour market. *PLoS One*. 2020;15(4):e0232032.
  83. Daniel E. Covid-19 highlights “crucial need” for digital infrastructure across the UK 2020 [Available from: <https://www.verdict.co.uk/uk-digital-infrastructure/>].
  84. Ryseff J. 2020. [cited 2021].
  85. Lustria ML, Smith SA, Hinnant CC. Exploring digital divides: an examination of eHealth technology use in health information seeking, communication and personal health information management in the USA. *Health Informatics J*. 2011;17(3):224-43.
  86. Hilbert M. The end justifies the definition: The manifold outlooks on the digital divide and their practical usefulness for policy-making. *Telecommunications Policy*. 2011;35(8):715-36.
  87. Nominet. Digital Access for All launches to help solve problem of digital exclusion 2020 [Available from: <https://www.nominet.uk/digital-access-for-all-launches-to-help-solve-problem-of-digital-exclusion/>].

- 1  
2  
3 88. Media P. Broadband providers to lift data caps during Covid-19 lockdown. The Guardian.  
4 2020.  
5  
6 89. Brookings. What the coronavirus reveals about the digital divide between schools and  
7 communities 2020 [Available from: [https://www.brookings.edu/blog/techtank/2020/03/17/what-](https://www.brookings.edu/blog/techtank/2020/03/17/what-the-coronavirus-reveals-about-the-digital-divide-between-schools-and-communities/)  
8 [the-coronavirus-reveals-about-the-digital-divide-between-schools-and-communities/](https://www.brookings.edu/blog/techtank/2020/03/17/what-the-coronavirus-reveals-about-the-digital-divide-between-schools-and-communities/).  
9  
10 90. Adler NE, Ostrove JM. Socioeconomic Status and Health: What We Know and What We  
11 Don't. *Annals of the New York Academy of Sciences*. 1999;896(1):3-15.  
12 91. Stringhini S, Carmeli C, Jokela M, Avendaño M, Muennig P, Guida F, et al. Socioeconomic  
13 status and the 25 × 25 risk factors as determinants of premature mortality: a multicohort study and  
14 meta-analysis of 1.7 million men and women. *The Lancet*. 2017;389(10075):1229-37.  
15 92. Keith RE, Crosson JC, O'Malley AS, Crompton D, Taylor EF. Using the Consolidated Framework  
16 for Implementation Research (CFIR) to produce actionable findings: a rapid-cycle evaluation  
17 approach to improving implementation. *Implementation Science*. 2017;12(1):15.  
18 93. Dryhurst S, Schneider CR, Kerr J, Freeman ALJ, Recchia G, van der Bles AM, et al. Risk  
19 perceptions of COVID-19 around the world. *Journal of Risk Research*. 2020;23(7-8):994-1006.  
20 94. Makri A. Bridging the digital divide in health care. *The Lancet Digital Health*.  
21 2019;1(5):e204-e5.  
22 95. Protheroe J, Whittle R, Bartlam B, Estacio EV, Clark L, Kurth J. Health literacy, associated  
23 lifestyle and demographic factors in adult population of an English city: a cross-sectional survey.  
24 *Health expectations : an international journal of public participation in health care and health*  
25 *policy*. 2017;20(1):112-9.  
26 96. Bentley CL, Powell LA, Orrell A, Mountain GA. Addressing design and suitability barriers to  
27 Telecare use: Has anything changed? *Technology and Disability*. 2014;26:221-35.  
28 97. Clark J, McGee-Lennon M. A stakeholder-centred exploration of the current barriers to the  
29 uptake of home care technology in the UK. *Journal of Assistive Technologies*. 2011;5(1):12-25.  
30 98. Zanaboni P, Wootton R. Adoption of routine telemedicine in Norwegian hospitals: progress  
31 over 5 years. *BMC Health Serv Res*. 2016;16:496.  
32 99. Haidt J, Allen N. Scrutinizing the effects of digital technology on mental health. *Nature*.  
33 2020;578(7794):226-7.  
34 100. Cherns A. Principles of Sociotechnical Design Revisited. *Human Relations*. 1987;40(3):153-  
35 61.  
36 101. Chalfont G, Mateus C, Varey S, Milligan C. Self-Efficacy of Older People Using Technology to  
37 Self-Manage COPD, Hypertension, Heart Failure, or Dementia at Home: An Overview of Systematic  
38 Reviews. *The Gerontologist*. 2020.  
39 102. Gilbert AW, Jones J, Stokes M, May CR. Factors that influence patient preferences for  
40 virtual consultations in an orthopaedic rehabilitation setting: a qualitative study. *BMJ open*.  
41 2021;11(2):e041038.  
42 103. Greenhalgh T, Wherton J, Papoutsis C, Lynch J, Hughes G, A'Court C, et al. Beyond Adoption:  
43 A New Framework for Theorizing and Evaluating Nonadoption, Abandonment, and Challenges to  
44 the Scale-Up, Spread, and Sustainability of Health and Care Technologies. *J Med Internet Res*.  
45 2017;19(11):e367.  
46 104. Isind AS, Lindroth T, Lundin J, Steineck G. Co-designing a digital platform with boundary  
47 objects: bringing together heterogeneous users in healthcare. *Health and Technology*.  
48 2019;9(4):425-38.  
49 105. NHS Digital. Digital inclusion in health and social care 2020 [Available from:  
50 [https://digital.nhs.uk/about-nhs-digital/our-work/digital-inclusion/digital-inclusion-in-health-and-](https://digital.nhs.uk/about-nhs-digital/our-work/digital-inclusion/digital-inclusion-in-health-and-social-care)  
51 [social-care](https://digital.nhs.uk/about-nhs-digital/our-work/digital-inclusion/digital-inclusion-in-health-and-social-care).  
52  
53 106. Hesse BW, Moser RP, Rutten LJ. Surveys of physicians and electronic health information. *N*  
54 *Engl J Med*. 2010;362(9):859-60.  
55  
56  
57  
58  
59  
60

- 1  
2  
3  
4  
5  
6  
7  
8  
9  
10  
11  
12  
13  
14  
15  
16  
17  
18  
19  
20  
21  
22  
23  
24  
25  
26  
27  
28  
29  
30  
31  
32  
33  
34  
35  
36  
37  
38  
39  
40  
41  
42  
43  
44  
45  
46  
47  
48  
49  
50  
51  
52  
53  
54  
55  
56  
57  
58  
59  
60
107. Huo J, Desai R, Hong Y-R, Turner K, Mainous AG, 3rd, Bian J. Use of Social Media in Health Communication: Findings From the Health Information National Trends Survey 2013, 2014, and 2017. *Cancer Control*. 2019;26(1):1073274819841442-.
108. Calixte R, Rivera A, Oridota O, Beauchamp W, Camacho-Rivera M. Social and Demographic Patterns of Health-Related Internet Use Among Adults in the United States: A Secondary Data Analysis of the Health Information National Trends Survey. *Int J Environ Res Public Health*. 2020;17(18):6856.
109. Glik DC. Risk communication for public health emergencies. *Annu Rev Public Health*. 2007;28:33-54.
110. Ranjit YS, Lachlan KA, Basaran A-MB, Snyder LB, Houston JB. Needing to know about the crisis back home: Disaster information seeking and disaster media effects following the 2015 Nepal earthquake among Nepalis living outside of Nepal. *International Journal of Disaster Risk Reduction*. 2020;50:101725.
111. Smailhodzic E, Hooijsma W, Boonstra A, Langley DJ. Social media use in healthcare: A systematic review of effects on patients and on their relationship with healthcare professionals. *BMC Health Services Research*. 2016;16(1):442.
112. Garfin DR. Technology as a coping tool during the coronavirus disease 2019 (COVID-19) pandemic: Implications and recommendations. *Stress Health*. 2020;36(4):555-9.
113. Phelan JC, Link BG, Diez-Roux A, Kawachi I, Levin B. "Fundamental causes" of social inequalities in mortality: a test of the theory. *J Health Soc Behav*. 2004;45(3):265-85.
114. Phelan JC, Link BG. Is Racism a Fundamental Cause of Inequalities in Health? *Annual Review of Sociology*. 2015;41(1):311-30.
115. Phelan JC, Link BG, Tehranifar P. Social conditions as fundamental causes of health inequalities: theory, evidence, and policy implications. *J Health Soc Behav*. 2010;51 Suppl:S28-40.
116. [cited 2020 December]. Available from: <https://www.bristolpost.co.uk/news/bristol-news/bristol-tackle-skepticism-covid-19-4804469> <https://www.cbsnews.com/news/covid-19-vaccine-why-some-black-americans-skeptical/>.
117. Jones Z. Why some black americans are sceptical of the covid-19 vaccine 2020 [
118. Lehner A, Nuißl K, Schlee W, Langguth B. Staying Connected: Reaching Out to Psychiatric Patients During the Covid-19 Lockdown Using an Online Blog. *Front Public Health*. 2020;8:592618.
119. Seabrook EM, Kern ML, Rickard NS. Social Networking Sites, Depression, and Anxiety: A Systematic Review. *JMIR Ment Health*. 2016;3(4):e50.
120. Choi NG, Marti CN, Bruce ML, Hegel MT, Wilson NL, Kunik ME. Six-month postintervention depression and disability outcomes of in-home telehealth problem-solving therapy for depressed, low-income homebound older adults. *Depress Anxiety*. 2014;31(8):653-61.
121. Naslund JA, Aschbrenner KA, Marsch LA, Bartels SJ. The future of mental health care: peer-to-peer support and social media. *Epidemiol Psychiatr Sci*. 2016;25(2):113-22.
122. Mickus MA, Luz CC. Televisits: sustaining long distance family relationships among institutionalized elders through technology. *Aging Ment Health*. 2002;6(4):387-96.
123. Porges SW. Social engagement and attachment: a phylogenetic perspective. *Ann N Y Acad Sci*. 2003;1008:31-47.
124. NHSx. Care homes to benefit from tech to help residents keep in touch with loved ones 2020 [Available from: <https://www.nhs.uk/news/care-homes-benefit-tech-help-residents-keep-touch-loved-ones/>].

1  
2  
3  
4  
5  
6  
7  
8  
9  
10  
11  
12  
13  
14  
15  
16  
17  
18  
19  
20  
21  
22  
23  
24  
25  
26  
27  
28  
29  
30  
31  
32  
33  
34  
35  
36  
37  
38  
39  
40  
41  
42  
43  
44  
45  
46  
47  
48  
49  
50  
51  
52  
53  
54  
55  
56  
57  
58  
59  
60

For peer review only

1  
2  
3  
4  
5  
6  
7  
8  
9  
10  
11  
12  
13  
14  
15  
16  
17  
18  
19  
20  
21  
22  
23  
24  
25  
26  
27  
28  
29  
30  
31  
32  
33  
34  
35  
36  
37  
38  
39  
40  
41  
42  
43  
44  
45  
46  
47  
48  
49  
50  
51  
52  
53  
54  
55  
56  
57  
58  
59  
60

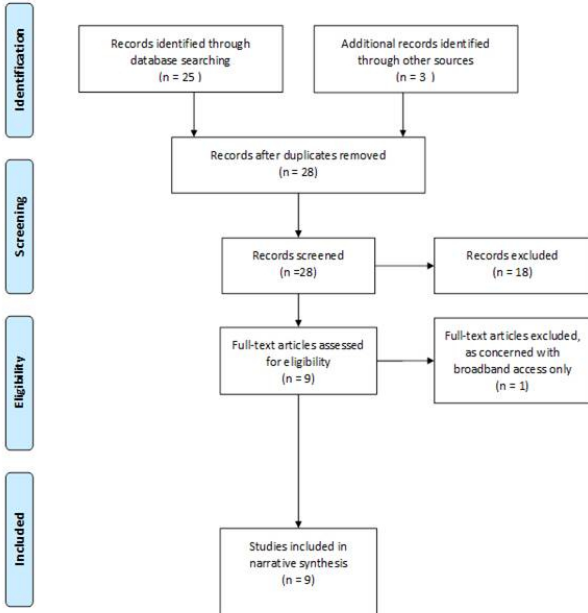

Figure 1 PRISMA diagram

81x60mm (300 x 300 DPI)



1  
2  
3 **Search terms**  
4  
5  
6

7 #1 'COVID 19' or 'pandemic' or 'COVID'  
8

9 #2 'digital health' or 'telemedicine' or 'remote access'  
10

11 #3 'digital divide'  
12

13 #4 #1 and #2 and #3  
14  
15  
16  
17  
18  
19  
20  
21  
22  
23  
24  
25  
26  
27  
28  
29  
30  
31  
32  
33  
34  
35  
36  
37  
38  
39  
40  
41  
42  
43  
44  
45  
46  
47  
48  
49  
50  
51  
52  
53  
54  
55  
56  
57  
58  
59  
60

For peer review only

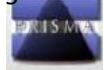

## PRISMA 2020 Checklist

| Section and Topic             | Item # | Checklist item                                                                                                                                                                                                                                                                                       | Location where item is reported |
|-------------------------------|--------|------------------------------------------------------------------------------------------------------------------------------------------------------------------------------------------------------------------------------------------------------------------------------------------------------|---------------------------------|
| <b>TITLE</b>                  |        |                                                                                                                                                                                                                                                                                                      |                                 |
| Title                         | 1      | Identify the report as a systematic review.                                                                                                                                                                                                                                                          | Title                           |
| <b>ABSTRACT</b>               |        |                                                                                                                                                                                                                                                                                                      |                                 |
| Abstract                      | 2      | See the PRISMA 2020 for Abstracts checklist.                                                                                                                                                                                                                                                         | N/A                             |
| <b>INTRODUCTION</b>           |        |                                                                                                                                                                                                                                                                                                      |                                 |
| Rationale                     | 3      | Describe the rationale for the review in the context of existing knowledge.                                                                                                                                                                                                                          | Pages 4/5                       |
| Objectives                    | 4      | Provide an explicit statement of the objective(s) or question(s) the review addresses.                                                                                                                                                                                                               | Page 5                          |
| <b>METHODS</b>                |        |                                                                                                                                                                                                                                                                                                      |                                 |
| Eligibility criteria          | 5      | Specify the inclusion and exclusion criteria for the review and how studies were grouped for the syntheses.                                                                                                                                                                                          | Page 6                          |
| Information sources           | 6      | Specify all databases, registers, websites, organisations, reference lists and other sources searched or consulted to identify studies. Specify the date when each source was last searched or consulted.                                                                                            | Page 6                          |
| Search strategy               | 7      | Present the full search strategies for all databases, registers and websites, including any filters and limits used.                                                                                                                                                                                 | Page 6                          |
| Selection process             | 8      | Specify the methods used to decide whether a study met the inclusion criteria of the review, including how many reviewers screened each record and each report retrieved, whether they worked independently, and if applicable, details of automation tools used in the process.                     | Page 7                          |
| Data collection process       | 9      | Specify the methods used to collect data from reports, including how many reviewers collected data from each report, whether they worked independently, any processes for obtaining or confirming data from study investigators, and if applicable, details of automation tools used in the process. | Page 7                          |
| Data items                    | 10a    | List and define all outcomes for which data were sought. Specify whether all results that were compatible with each outcome domain in each study were sought (e.g. for all measures, time points, analyses), and if not, the methods used to decide which results to collect.                        | N/A                             |
|                               | 10b    | List and define all other variables for which data were sought (e.g. participant and intervention characteristics, funding sources). Describe any assumptions made about any missing or unclear information.                                                                                         | N/A                             |
| Study risk of bias assessment | 11     | Specify the methods used to assess risk of bias in the included studies, including details of the tool(s) used, how many reviewers assessed each study and whether they worked independently, and if applicable, details of automation tools used in the process.                                    | N/A                             |
| Effect measures               | 12     | Specify for each outcome the effect measure(s) (e.g. risk ratio, mean difference) used in the synthesis or presentation of results.                                                                                                                                                                  | N/A                             |
| Synthesis methods             | 13a    | Describe the processes used to decide which studies were eligible for each synthesis (e.g. tabulating the study intervention characteristics and comparing against the planned groups for each synthesis (item #5)).                                                                                 | N/A                             |
|                               | 13b    | Describe any methods required to prepare the data for presentation or synthesis, such as handling of missing summary statistics, or data conversions.                                                                                                                                                | N/A                             |
|                               | 13c    | Describe any methods used to tabulate or visually display results of individual studies and syntheses.                                                                                                                                                                                               | N/A                             |
|                               | 13d    | Describe any methods used to synthesize results and provide a rationale for the choice(s). If meta-analysis was performed, describe the model(s), method(s) to identify the presence and extent of statistical heterogeneity, and software package(s) used.                                          | N/A                             |
|                               | 13e    | Describe any methods used to explore possible causes of heterogeneity among study results (e.g. subgroup analysis, meta-regression).                                                                                                                                                                 | N/A                             |
|                               | 13f    | Describe any sensitivity analyses conducted to assess robustness of the synthesized results.                                                                                                                                                                                                         | N/A                             |
| Reporting bias assessment     | 14     | Describe any methods used to assess risk of bias due to missing results in a synthesis (arising from reporting biases).                                                                                                                                                                              | N/A                             |
| Certainty assessment          | 15     | Describe any methods used to assess certainty (or confidence) in the body of evidence for an outcome.                                                                                                                                                                                                | N/A                             |
| <b>RESULTS</b>                |        |                                                                                                                                                                                                                                                                                                      |                                 |



| Section and Topic                              | Item # | Checklist item                                                                                                                                                                                                                                                                       | Location where item is reported |
|------------------------------------------------|--------|--------------------------------------------------------------------------------------------------------------------------------------------------------------------------------------------------------------------------------------------------------------------------------------|---------------------------------|
| Study selection                                | 16a    | Describe the results of the search and selection process, from the number of records identified in the search to the number of studies included in the review, ideally using a flow diagram.                                                                                         | Page 27                         |
|                                                | 16b    | Cite studies that might appear to meet the inclusion criteria, but which were excluded, and explain why they were excluded.                                                                                                                                                          | Page 9                          |
| Study characteristics                          | 17     | Cite each included study and present its characteristics.                                                                                                                                                                                                                            | Page 8                          |
| Risk of bias in studies                        | 18     | Present assessments of risk of bias for each included study.                                                                                                                                                                                                                         | N/A                             |
| Results of individual studies                  | 19     | For all outcomes, present, for each study: (a) summary statistics for each group (where appropriate) and (b) an effect estimate and its precision (e.g. confidence/credible interval), ideally using structured tables or plots.                                                     | Page 8                          |
| Results of syntheses                           | 20a    | For each synthesis, briefly summarise the characteristics and risk of bias among contributing studies.                                                                                                                                                                               | N/A                             |
|                                                | 20b    | Present results of all statistical syntheses conducted. If meta-analysis was done, present for each the summary estimate and its precision (e.g. confidence/credible interval) and measures of statistical heterogeneity. If comparing groups, describe the direction of the effect. | N/A                             |
|                                                | 20c    | Present results of all investigations of possible causes of heterogeneity among study results.                                                                                                                                                                                       | N/A                             |
|                                                | 20d    | Present results of all sensitivity analyses conducted to assess the robustness of the synthesized results.                                                                                                                                                                           | N/A                             |
| Reporting biases                               | 21     | Present assessments of risk of bias due to missing results (arising from reporting biases) for each synthesis assessed.                                                                                                                                                              | NA                              |
| Certainty of evidence                          | 22     | Present assessments of certainty (or confidence) in the body of evidence for each outcome assessed.                                                                                                                                                                                  | Page 8                          |
| <b>DISCUSSION</b>                              |        |                                                                                                                                                                                                                                                                                      |                                 |
| Discussion                                     | 23a    | Provide a general interpretation of the results in the context of other evidence.                                                                                                                                                                                                    | Page 15                         |
|                                                | 23b    | Discuss any limitations of the evidence included in the review.                                                                                                                                                                                                                      | Pages 15/16                     |
|                                                | 23c    | Discuss any limitations of the review processes used.                                                                                                                                                                                                                                | Page 16                         |
|                                                | 23d    | Discuss implications of the results for practice, policy, and future research.                                                                                                                                                                                                       | Pages 16/19                     |
| <b>OTHER INFORMATION</b>                       |        |                                                                                                                                                                                                                                                                                      |                                 |
| Registration and protocol                      | 24a    | Provide registration information for the review, including register name and registration number, or state that the review was not registered.                                                                                                                                       | N/A                             |
|                                                | 24b    | Indicate where the review protocol can be accessed, or state that a protocol was not prepared.                                                                                                                                                                                       | N/A                             |
|                                                | 24c    | Describe and explain any amendments to information provided at registration or in the protocol.                                                                                                                                                                                      | N/A                             |
| Support                                        | 25     | Describe sources of financial or non-financial support for the review, and the role of the funders or sponsors in the review.                                                                                                                                                        | Page 19                         |
| Competing interests                            | 26     | Declare any competing interests of review authors.                                                                                                                                                                                                                                   | Page 19                         |
| Availability of data, code and other materials | 27     | Report which of the following are publicly available and where they can be found: template data collection forms; data extracted from included studies; data used for all analyses; analytic code; any other materials used in the review.                                           | N/A                             |

From: Page MJ, McKenzie JE, Bossuyt PM, Boutron I, Hoffmann TC, Mulrow CD, et al. The PRISMA 2020 statement: an updated guideline for reporting systematic reviews. *BMJ* 2021;372:n71. doi: 10.1136/bmj.n71
