# Supplementary material for: Impact of COVID-19 on the digital divide: a rapid review
Source: PubMed Central journal article supplement — BMJ Open. 2021 Oct 12;11(10):e053440. doi: 10.1136/bmjopen-2021-053440 (PMC8520586; doi:10.1136/bmjopen-2021-053440), 2021-10-12
Supplement: bmjopen-2021-053440supp001.pdf [file bmjopen-2021-053440supp001.pdf]

**Search terms**

#1 'COVID 19' or 'pandemic' or 'COVID'

#2 'digital health' or 'telemedicine' or 'remote access'

#3 'digital divide'

#4 #1 and #2 and #3
